1 **Cortical *Foxp2* supports behavioral flexibility and developmental dopamine D1**  
2 **receptor expression**

3 Marissa Co, Stephanie L. Hickey, Ashwinikumar Kulkarni, Matthew Harper, Genevieve  
4 Konopka\*

5 Department of Neuroscience, University of Texas Southwestern Medical Center, Dallas,  
6 TX, USA

7

8 **\*Corresponding author**

9 Genevieve Konopka, Ph.D.

10 Department of Neuroscience, University of Texas Southwestern Medical Center,

11 5323 Harry Hines Blvd., ND4.300, Dallas, TX 75390-9111

12 TEL: 214-648-5135, FAX: 214-648-1801

13 Email: [Genevieve.Konopka@utsouthwestern.edu](mailto:Genevieve.Konopka@utsouthwestern.edu)

14

15 **Running title:** *Foxp2* modulates cortical function

16 **Abstract**

17 Genetic studies have associated *FOXP2* variation with speech and language disorders  
18 and other neurodevelopmental disorders involving pathology of the cortex. In this brain  
19 region, *FoxP2* is expressed from development into adulthood, but little is known about its  
20 downstream molecular and behavioral functions. Here, we characterized cortex-specific  
21 *Foxp2* conditional knockout mice and found a major deficit in reversal learning, a form of  
22 behavioral flexibility. In contrast, they showed normal activity levels, anxiety, and  
23 vocalizations, save for a slight decrease in neonatal call loudness. These behavioral  
24 phenotypes were accompanied by decreased cortical dopamine D1 receptor (D1R)  
25 expression at neonatal and adult stages, while general cortical development remained  
26 unaffected. Finally, using single-cell transcriptomics, we identified at least five excitatory  
27 and three inhibitory D1R-expressing cell types in neonatal frontal cortex, and we found  
28 changes in D1R cell type composition and gene expression upon cortical *Foxp2* deletion.  
29 Strikingly, these alterations included non-cell-autonomous changes in upper-layer  
30 neurons and interneurons. Together these data support a role for *Foxp2* in the  
31 development of dopamine-modulated cortical circuits and behaviors relevant to  
32 neurodevelopmental disorders.

33

34 **Keywords:** dopamine, *Foxp2*, prefrontal cortex, reversal learning, single-cell RNA-seq

## 35 Introduction

36 *FoxP2* encodes a forkhead box transcription factor required for proper brain  
37 development and function across species, particularly in neural circuits underlying  
38 vocalization and motor-skill learning (French and Fisher 2014; Konopka and Roberts  
39 2016). In humans, *FOXP2* mutations cause a speech and language disorder  
40 characterized by childhood apraxia of speech and additional oral motor, linguistic, and/or  
41 cognitive deficits (Morgan et al. 2017; Schulze et al. 2017). Recent studies have  
42 broadened the clinical spectrum of *FOXP2* by identifying variants associated with autism  
43 spectrum disorder (ASD) and attention deficit/hyperactivity disorder (ADHD) (Demontis  
44 et al. 2019; Reuter et al. 2017; Satterstrom et al. 2019). Thus, *FOXP2* may subserve  
45 general neural functions impaired across neurodevelopmental disorders (NDDs).

46 *FoxP2* is expressed in the developing and mature cerebral cortex, a site of  
47 pathology in *FOXP2*-related speech and language disorders as well as in ASD (van Rooij  
48 et al. 2018; Vargha-Khadem et al. 2005). Here, *Foxp2* expression is specific to layer 6  
49 corticothalamic projection neurons (CThPNs) and some layer 5 pyramidal tract neurons  
50 but excluded from intratelencephalic projection neurons (ITPNs) (Kast et al. 2019;  
51 Sorensen et al. 2015; Tasic et al. 2016). Acute manipulations of *Foxp2* expression in  
52 embryonic cortex have implicated this gene in cortical neurogenesis and neuronal  
53 migration (Garcia-Calero et al. 2016; Tsui et al. 2013). However, mice with cortical *Foxp2*  
54 deletion show overtly normal cortical histoarchitecture, suggesting that *Foxp2* may be  
55 dispensable for gross corticogenesis (French et al. 2018; Kast et al. 2019; Medvedeva et  
56 al. 2018). Nonetheless, these mice show abnormalities in social behavior and motor-skill  
57 learning, warranting further investigation into molecular and cellular processes disrupted

58 by cortical *Foxp2* deletion (French et al. 2018; Medvedeva et al. 2018). *Foxp2* has been  
59 shown to act upstream of two synaptic genes, *Srpx2* and *Mint2*, in cortical neurons, but  
60 little else is known about molecular networks regulated by *Foxp2* specifically in the cortex  
61 (Medvedeva et al. 2018; Sia et al. 2013). Furthermore, it is unknown whether loss of  
62 cortical *Foxp2* causes additional NDD-relevant behavioral deficits, such as cognitive  
63 impairment or hyperactivity.

64 In this study, we characterized NDD-relevant behaviors and their potential  
65 underlying cellular and molecular mechanisms in cortex-specific *Foxp2* conditional  
66 knockout mice (*Emx1-Cre; Foxp2<sup>flox/flox</sup>*). We show that this deletion impaired reversal  
67 learning, a form of behavioral flexibility, while sparing other NDD-associated behaviors,  
68 such as vocal communication and hyperactivity. Using immunohistochemistry and  
69 genetic reporter mice, we confirmed grossly normal cortical development upon *Foxp2*  
70 deletion but found decreased expression of cortical dopamine D1 receptors at neonatal  
71 and adult stages. Last, using single-cell transcriptomics, we characterized neonatal  
72 dopamine D1 receptor-expressing neuronal subtypes, and we identified non-cell-  
73 autonomous effects of *Foxp2* deletion on interneuron development and upper-layer gene  
74 expression. Together these data support a role for *Foxp2* in specific aspects of cortical  
75 development potentially relevant to cognitive impairments seen in NDDs.

76

## 77 **Materials and Methods**

### 78 **Mice**

79 All procedures were approved by the Institutional Animal Care and Use Committee of UT  
80 Southwestern. *Emx1-Cre* (Gorski et al. 2002) (#005628, Jackson Laboratory),

81 *Foxp2<sup>flox/flox</sup>* (French et al. 2007) (#026259, Jackson Laboratory) and *Drd1a-tdTomato* line  
82 6 mice (Ade et al. 2011) (#016204, Jackson Laboratory, provided by Dr. Craig Powell)  
83 were backcrossed with C57BL/6J mice for at least 10 generations. Genotyping primers  
84 can be found in Supplemental Table 1. Experimental mice (*Foxp2* cKO) and control  
85 littermates were generated by crossing male *Emx1-Cre; Foxp2<sup>flox/flox</sup>* mice with female  
86 *Foxp2<sup>flox/flox</sup>* mice. When used, *Drd1a-tdTomato* was present in mice of either sex for  
87 breeding. Mice were group-housed under a 12 h light/dark cycle and given *ad libitum*  
88 access to food and water. Mice of both sexes were used for all experiments except adult  
89 USVs, which were measured in male mice.

## 90 **Behavioral analyses**

91 Adult *Foxp2* cKO and control littermates were tested at age 10-20 weeks, and pups were  
92 tested at postnatal days 4, 7, 10, and 14. Additional behavioral procedures can be found  
93 in the Supplemental Material.

## 94 **Reversal learning in water Y-maze**

95 Mice were tested according to (Stoodley et al. 2017) using a Y-shaped apparatus filled  
96 with 20-22°C water up to 0.5 cm above a clear movable platform. On day 1, mice were  
97 habituated to the maze for 1 min without the platform. On days 2-4 (Training 1-3), mice  
98 were given 15 trials/day, up to 30 s each, to learn the platform location in one of the maze  
99 arms. Platform location was counter-balanced by cage to control for side biases. On days  
100 4-6 (Reversal 1-3), the platform was moved to the opposite arm and mice were given 15  
101 trials/day to learn the new location. The fraction of correct trials per day was calculated,  
102 as well as number of trials to reach a criterion of 5 consecutive correct trials. Differences

103 between genotypes were assessed using a two-way ANOVA with Bonferroni's multiple  
104 comparisons test.

### 105 **Adult courtship ultrasonic vocalizations**

106 Mice were tested according to (Araujo et al. 2017). Male test mice were paired with age-  
107 matched C57BL/6J females for 1 week, then single-housed for 1 week. On the test day,  
108 males were habituated in their home cages to the testing room for 30 min, during which  
109 their cage lids were replaced with Styrofoam lids containing UltraSoundGate condenser  
110 microphones (Avisoft Bioacoustics) positioned at a fixed height of 20 cm. The  
111 microphones were connected to UltraSoundGate 416H hardware (Avisoft Bioacoustics)  
112 connected to a computer running RECORDER software (Avisoft Bioacoustics). At the  
113 start of testing, an unmated age-matched C57BL/6J female was placed in each cage and  
114 resultant male songs were recorded for 3 min. Spectrogram preparation and call detection  
115 were performed using MATLAB code developed by (Rieger and Dougherty 2016) based  
116 on methods from (Holy and Guo 2005). Differences between genotypes were assessed  
117 using unpaired t-tests. Call repertoire analysis was performed using the MUPET MATLAB  
118 package (Van Segbroeck et al. 2017) with a repertoire size of 100 units.

### 119 **Neonatal isolation ultrasonic vocalizations**

120 Mice were tested according to (Araujo et al. 2015). After habituation in their home cages  
121 to the testing room for 30 min, individual pups were placed in plastic containers within 1  
122 of 4 soundproof Styrofoam boxes with lids containing UltraSoundGate condenser  
123 microphones. Pups were randomly assigned to recording boxes at each postnatal time  
124 point. Isolation USVs were recorded for 3 min and analyzed using the same MATLAB  
125 code used for adult USV analysis (Rieger and Dougherty 2016). Other than call number,

126 USV features were only computed for pups emitting at least 10 calls during the recording  
127 session. Differences between genotypes were assessed using a two-way ANOVA with  
128 Bonferroni's multiple comparisons test.

### 129 **Immunohistochemistry**

130 Neonatal and adult mice were anesthetized (pups by cryoanesthetization, adults by  
131 injection with 80-100 mg/kg Euthasol) and transcardially perfused with 4% PFA, and their  
132 brains were post-fixed overnight in 4% PFA. After cryoprotection in 30% sucrose  
133 overnight, brains were embedded in Tissue-Tek CRYO-OCT Compound (#14-373-65,  
134 Thermo Fisher Scientific) and cryosectioned at 20-40  $\mu\text{m}$ . Staining was performed on  
135 free-floating sections and all washes were performed with TBS or 0.4% Triton X-100 in  
136 TBS (TBS-T) unless otherwise stated. For TLE4 staining, antigen retrieval was performed  
137 in citrate buffer (10 mM tri-sodium citrate, 0.05% Tween-20, pH 6) for 10 min at 95°C.  
138 Free aldehydes were quenched with 0.3M glycine in TBS for 1 h at room temperature.  
139 Sections were incubated overnight at 4°C in primary antibodies diluted in 3% normal  
140 donkey serum and 10% bovine serum albumin (BSA) in TBS-T. Secondary antibody  
141 incubations were performed for 1 h at room temperature in 10% BSA in TBS-T. Sections  
142 were mounted onto slides, incubated in DAPI solution (600 nM in PBS) for 5 min at room  
143 temperature, and washed 3X with PBS. Coverslips were mounted using ProLong  
144 Diamond Antifade Mountant (#P36970, Thermo Fisher Scientific). The following  
145 antibodies and dilutions were used: mouse  $\alpha$ - $\beta$ -actin (#A1978, Millipore Sigma, 10  $\mu\text{g}/\text{ml}$ ),  
146 rabbit  $\alpha$ - $\beta$ -tubulin (#ab6046, Abcam, 1:500), mouse  $\alpha$ -DARPP-32 (#sc-271111, Santa  
147 Cruz Biotechnology, 1:250), rabbit  $\alpha$ -FOXP2 (#5337S, Cell Signaling Technology, 1:250),  
148 rabbit  $\alpha$ -SP9 (#PA564038, Thermo Fisher Scientific, 1:100), goat  $\alpha$ -tdTomato (#LS-

149 C340696, LifeSpan BioSciences, 1:500), mouse  $\alpha$ -TLE4 (#sc-365406, Santa Cruz  
150 Biotechnology, 1:200), species-specific secondary antibodies produced in donkey and  
151 conjugated to Alexa Fluor 488, Alexa Fluor 555, or Alexa Fluor 647 (Thermo Fisher  
152 Scientific, 1:2000).

### 153 **Imaging and Image Analysis**

154 Images were acquired using a Zeiss LSM 880 confocal microscope at the UT  
155 Southwestern Neuroscience Microscopy Facility and processed and analyzed using  
156 Zeiss ZEN Lite and FIJI. For quantifications, tile scan Z-stack images of the region of  
157 interest were acquired at 20X magnification from similar coronal sections across 2-3  
158 mice/genotype. Stitched maximum intensity projection images were used for manual cell  
159 counting using the FIJI Cell Counter plugin or for fluorescence intensity measurements  
160 using the FIJI Plot Profile function. For tdTomato+ cell counts by layer, layers in mPFC  
161 were defined based a combination of DAPI-based cytoarchitecture and TLE4+ cell  
162 distribution. Differences between genotypes were assessed using a two-way ANOVA with  
163 Bonferroni's multiple comparisons test.

### 164 **Western blotting**

165 Western blotting was performed as previously described (Araujo et al. 2015). Frontal  
166 cortex tissue from 3 mice/genotype at P7 was lysed in RIPA buffer containing protease  
167 inhibitors. Protein concentrations were determined via Bradford assay (Bio-Rad  
168 Laboratories) and 50  $\mu$ g protein per sample were run on an SDS-PAGE gel and  
169 transferred to an Immun-Blot PVDF Membrane (Bio-Rad Laboratories) using standard  
170 protocols. The following antibodies and dilutions were used: rabbit  $\alpha$ -DARPP-32  
171 (#AB10518, Millipore Sigma, 1  $\mu$ g/ml), mouse  $\alpha$ -GAPDH (#MAB374, Millipore Sigma,



172 1:10,000), donkey  $\alpha$ -rabbit IgG IRDye 800 (#926-32213, LI-COR Biosciences, 1:20,000),  
173 donkey  $\alpha$ -mouse IgG IRDye 680 (#926-68072, LI-COR Biosciences, 1:20,000). Blots  
174 were imaged using an Odyssey Infrared Imaging System (LI-COR Biosciences).

## 175 **Single-cell RNA-seq (scRNA-seq)**

### 176 **Tissue processing and library generation**

177 Tissue was dissociated for scRNA-seq based on (Tasic et al. 2016). P7 mice were  
178 sacrificed by rapid decapitation and brains were quickly removed and placed in ice-cold  
179 artificial cerebrospinal fluid (ACSF) (126 mM NaCl, 20 mM NaHCO<sub>3</sub>, 20 mM D-Glucose,  
180 3 mM KCl, 1.25 mM NaH<sub>2</sub>PO<sub>4</sub>, 2 mM CaCl<sub>2</sub>, 2 mM MgCl<sub>2</sub>) bubbled with 95% O<sub>2</sub> and 5%  
181 CO<sub>2</sub>. 400- $\mu$ m coronal sections were made in ACSF using a VF-200 Compressstome and  
182 transferred to a room temperature recovery chamber with ACSF containing channel  
183 blockers DL-AP5 sodium salt (50  $\mu$ M), DNQX (20  $\mu$ M), and tetrodotoxin (100 nM)  
184 (ACSF+). After 5 min, frontal isocortex was separated from olfactory areas, cut into  
185 smaller pieces and incubated in 1 mg/ml pronase (#P6911, Sigma-Aldrich) in ACSF+ for  
186 5 min. Pronase solution was replaced with 1% BSA in ACSF and tissue pieces were  
187 gently triturated into single-cell suspension using polished glass Pasteur pipettes with 600  
188  $\mu$ m, 300  $\mu$ m, and 150  $\mu$ m openings. Cells were filtered twice through Flowmi 40  $\mu$ m Cell  
189 Strainers (#H13680-0040, Bel-Art) and live, single tdTomato+ cells were sorted using a  
190 BD FACSAria (BD Biosciences) at the UT Southwestern Flow Cytometry Facility. After  
191 sorting, cells were centrifuged and resuspended in 0.04% BSA in ACSF to target 1000  
192 cells/sample using the Chromium Single Cell 3' Library & Gel Bead Kit v2 (#120237, 10x  
193 Genomics) (Zheng et al. 2017). Tissue and library preparation were performed in the  
194 following batches: Batch 1 – D1Tom-CTL1 (F), D1Tom-CKO1 (F); Batch 2 – D1Tom-

195 CTL2 (F), D1Tom-CKO2 (M). Libraries were sequenced using an Illumina NextSeq 500  
196 at the McDermott Sequencing Core at UT Southwestern.

### 197 **Data processing**

198 BCL files were demultiplexed with the i7 index using Illumina's *bcl2fastq* v2.17.1.14 and  
199 *mkfastq* from 10x Genomics Cell Ranger v2.1.1. Extracted paired-end fastq files,  
200 consisting of a 26 bp cell barcode and unique molecular identifier (UMI) (R1) and a 124  
201 bp transcript sequence (R2), were checked for read quality using FASTQC v0.11.5  
202 (Andrews 2010). R1 reads were used to estimate and identify real cells using *whitelist*  
203 from UMI-tools v0.5.4 (Smith et al. 2017). A whitelist of cell barcodes and R2 fastq files  
204 were used to extract reads corresponding to cells using *extract* from UMI-tools v0.5.4.  
205 This step also appended the cell barcode and UMI sequence information from R1 to read  
206 names in the R2 fastq file. Extracted R2 reads were aligned to the mouse reference  
207 genome (MM10/GRCm38p6) from the UCSC genome browser (Kent et al. 2002) and  
208 reference annotation (Gencode vM17) using STAR v2.5.2b (Dobin et al. 2013) allowing  
209 up to 5 mismatches. Uniquely mapped reads were assigned to exons using *featureCounts*  
210 from the Subread package (v1.6.2) (Liao et al. 2014). Assigned reads were sorted and  
211 indexed using Samtools v1.6 (Liao et al. 2014) and then used to generate raw expression  
212 UMI count tables using *count* from UMI-tools v0.5.4. For libraries sequenced in multiple  
213 runs, the commonly identified cell barcodes between runs were used for downstream  
214 analysis.

### 215 **Clustering analysis**

216 Cell clusters were identified using the Seurat R package (Butler et al. 2018). Individual  
217 cells were retained in the dataset based on the following criteria: <20,000 UMIs, <10%

218 mitochondrial transcripts, <20% ribosomal protein gene transcripts. Sex chromosome and  
219 mitochondrial genes were removed from the analysis after filtering. The filtered data were  
220 log normalized with a scale factor of 10,000 using *NormalizeData*, and 1576 variable  
221 genes were identified with *FindVariableGenes* using the following parameters:  
222 mean.function = ExpMean, dispersion.function = LogVMR, x.low.cutoff = 0.2, x.high.cutoff  
223 = 2.5, y.cutoff = 0.5. Cell cycle scores were calculated using *CellCycleScoring* as per the  
224 Satija Lab cell cycle vignette ([https://satijalab.org/seurat/cell\\_cycle\\_vignette.html](https://satijalab.org/seurat/cell_cycle_vignette.html)). UMI  
225 number, percent mitochondrial transcripts, percent ribosomal protein gene transcripts,  
226 library, and cell cycle scores were regressed during scaling. Using JackStraw analysis,  
227 we selected principal components (PCs) 1-47 for clustering, excluding PCs with >1  
228 immediate early gene (IEG) in the top 30 associated genes. We used a resolution of 1.6  
229 for UMAP clustering and *ValidateClusters* with default parameters did not lead to cluster  
230 merging.

### 231 **Cell type annotation**

232 Cluster marker genes were identified using *FindAllMarkers* with default parameters.  
233 Clusters were broadly annotated by enriched expression of canonical marker genes (e.g.  
234 Astrocytes: *Aqp4*; Microglia: *P2ry12*; Neurons: *Rbfox1*; Excitatory neurons: *Slc17a7*;  
235 Layer 2-4 neurons: *Satb2*; L5-6 neurons: *Fezf2*, *Tbr1*; L1 neurons: *Lhx5*; Interneurons:  
236 *Gad1*; Oligodendrocytes: *Sox10*). We refined these annotations by comparing our cluster  
237 markers with markers from a published scRNA-seq dataset from P0 mouse cortex (Loo  
238 et al. 2019). Metadata and raw expression values for this dataset were downloaded from  
239 <https://github.com/jeremysimon/MouseCortex>. Cells were filtered as in the original  
240 publication and expression values normalized using Seurat's *NormalizeData* with default

241 parameters. The cluster identity of each cell was imported from the published metadata  
242 and cluster marker genes were identified using *FindAllMarkers* in Seurat. Enrichment of  
243 significant P0 marker genes (adj  $p < 0.05$ ) among our P7 cluster marker genes was  
244 analyzed using hypergeometric testing with a background of 2800 genes (the average of  
245 the median number of expressed genes in each cluster). P values were corrected for  
246 multiple comparisons using the Benjamini-Hochberg procedure.

### 247 **Neuronal re-clustering and annotation**

248 Cells belonging to neuronal clusters (Clusters 2, 6, 8, 10-12, 14-17 in Supplemental Fig.  
249 4B) were pulled from the full dataset and re-clustered with resolution 1.2 and PCs 1-59,  
250 excluding PCs with  $>1$  IEG in the top 30 associated genes. Cell type annotation was  
251 performed as described above and refined using scRNA-seq marker genes identified in  
252 adult anterior lateral motor cortex (Tasic et al. 2018) ([http://celltypes.brain-  
253 map.org/rnaseq/mouse](http://celltypes.brain-map.org/rnaseq/mouse)). Two neuronal clusters (Clusters 2, 7) with enrichment of glial,  
254 mitochondrial, and/or ribosomal genes among their marker genes were included in  
255 analyses but excluded from data visualizations. Contributions of neurons to each cluster  
256 by genotype were compared using Fisher's exact test.

### 257 **Differential gene expression analyses**

258 We used the Wilcoxon rank sum test to calculate pseudo-bulk RNA-seq differentially  
259 expressed genes (DEGs) in two approaches: between genotypes for all neurons or  
260 between genotypes within each neuronal cluster. Enrichment of all-neuron DEGs among  
261 neuronal cluster markers was analyzed using hypergeometric testing with a background  
262 of 2800 genes. Gene ontology (GO) analysis was performed using ToppFun from the  
263 ToppGene Suite with default parameters (Chen et al. 2009), and Biological Process GO

264 categories with Benjamini-Hochberg (BH) FDR<0.05 were summarized using REVIGO,  
265 with allowed similarity=0.5 and GO term database for *Mus musculus* (Supek et al. 2011).  
266 To identify putative Foxp2 direct gene targets, we calculated the Spearman correlation  
267 coefficients between *Foxp2* and all other genes in control cells, and then overlapped  
268 genes with  $|\rho|>0.1$  and BH FDR<0.05 with the E16.5 brain Foxp2 ChIP long list from  
269 (Vernes et al. 2011).

## 270 **Gene Expression Omnibus (GEO) accession information**

271 The National Center for Biotechnology Information GEO accession number for the  
272 scRNA-seq data reported in this study is GSE130653 (token: mzyqiqcotlwtdep).

273

## 274 **Results**

### 275 **Cortical *Foxp2* deletion impairs reversal learning**

276 We generated cortex-specific *Foxp2* conditional knockout (cKO) mice and control  
277 littermates by crossing *Foxp2<sup>flox/flox</sup>* mice (French et al. 2007) with mice expressing *Emx1-*  
278 *Cre*, which induces recombination embryonically in progenitors and projection neurons  
279 derived from dorsal telencephalon (Gorski et al. 2002) (Fig. 1A). In adult *Foxp2* cKO mice,  
280 we confirmed the absence of Foxp2 protein in the cortex and normal expression in other  
281 brain regions (Supplemental Fig. 1A). Consistent with known expression patterns of  
282 *Foxp2* in wild-type mouse brain, Foxp2 protein was absent from control hippocampus,  
283 where *Emx1-Cre* is also expressed (Ferland et al. 2003; Gorski et al. 2002)  
284 (Supplemental Fig. 1A). We observed no gross abnormalities in overall brain morphology  
285 of cKO mice (Supplemental Fig. 1A), consistent with a previous study utilizing the same  
286 conditional knockout strategy (French et al. 2018). In neonatal frontal cortex, we

287 quantified a >90% reduction in *Foxp2* protein content, confirming the efficiency of  
288 knockout in developing cortex (Supplemental Fig. 1B).

289 We evaluated the contribution of cortical *Foxp2* to neurodevelopmental disorder  
290 (NDD)-relevant behaviors, such as behavioral flexibility, hyperactivity, anxiety, and social  
291 communication. To assess behavioral flexibility in *Foxp2* cKO mice, we utilized a water  
292 Y-maze assay and found significant deficits in reversal learning, but not initial acquisition,  
293 of escape platform location (Fig. 1B-C, statistics for behavioral testing are provided  
294 Supplemental Table 2). As an additional assay of frontal cortical function, we assessed  
295 spontaneous alternation in a dry T-maze (Lalonde 2002). While there were no significant  
296 differences between genotypes in alternation rate or latency to arm, control mice  
297 alternated significantly above chance levels while cKO mice did not (Supplemental Fig.  
298 2A-B, Supplemental Table 2).

299 We performed additional assays to determine whether locomotor or anxiety  
300 phenotypes contributed to *Foxp2* cKO impairment in these cognitive tasks. There were  
301 no differences in baseline activity levels in a novel cage (Supplemental Fig. 2C,  
302 Supplemental Table 2) or total distance moved in an open field (Supplemental Fig. 2D,  
303 Supplemental Table 2). Furthermore, each genotype spent equal amounts of time in the  
304 center or open arms of the open field or elevated plus maze, respectively, indicating  
305 normal anxiety levels in cKO mice (Supplemental Fig. 2E-F, Supplemental Table 2).  
306 Altogether these data indicate that cortical *Foxp2* is required for behavioral flexibility in  
307 mice, but not for regulation of activity or anxiety levels.

308 **Cortical *Foxp2* deletion decreases sound pressure of neonatal vocalizations**

309 We evaluated the contribution of cortical *Foxp2* to social communication by  
310 measuring courtship ultrasonic vocalization (USV) production and spectral features in  
311 adult *Emx1-Cre Foxp2* cKO mice. Using automated call detection methods (Holy and Guo  
312 2005), we found no differences between genotypes in measures related to call number,  
313 timing, structure, pitch, or intensity (Fig. 1D, Supplemental Table 2). We next used an  
314 automated method to cluster calls into 100 call types (repertoire units or RUs) and  
315 compare repertoires between genotypes (Van Segbroeck et al. 2017) (Fig. 1E-F and  
316 Supplemental Fig. 2G). This yielded a similarity matrix comparable to matrices generated  
317 between cohorts of wild-type C57BL/6 mice (Van Segbroeck et al. 2017), with the top 74  
318 of 100 RUs having Pearson correlations greater than 0.8 (Fig. 1E). Because the similarity  
319 matrix does not account for frequency of call types used, we calculated a median (top  
320 50% most used RUs) similarity score of 0.90 and an overall (top 95%) similarity score of  
321 0.86 between control and cKO repertoires (Fig. 1F). Comparing this to the average  
322 similarity of  $0.91 \pm 0.03$  between replicate C57BL/6 studies (Van Segbroeck et al. 2017)  
323 leads us to conclude that cKO mice do not differ greatly from controls in courtship call  
324 structure and usage.

325 We also investigated the contribution of cortical *Foxp2* to isolation USVs across  
326 postnatal development (P4, P7, P10, P14). Again, we found no differences between  
327 genotypes in measures related to call number, timing, structure, or pitch (Fig. 1G,  
328 Supplemental Table 2). There was, however, a small but significant decrease in the  
329 relative sound pressure of calls emitted by *Foxp2* cKO pups across development (Fig.  
330 1G, Supplemental Table 2). This decrease in loudness was not due to somatic weakness,  
331 as cKO pups gained weight and performed gross motor functions normally (Supplemental



332 Fig. 2H-J, Supplemental Table 2). In summary, cortical *Foxp2* plays a specific role in  
 333 loudness of neonatal vocalizations, but not in production or other acoustic features of  
 334 neonatal or adult vocalizations.  
 335

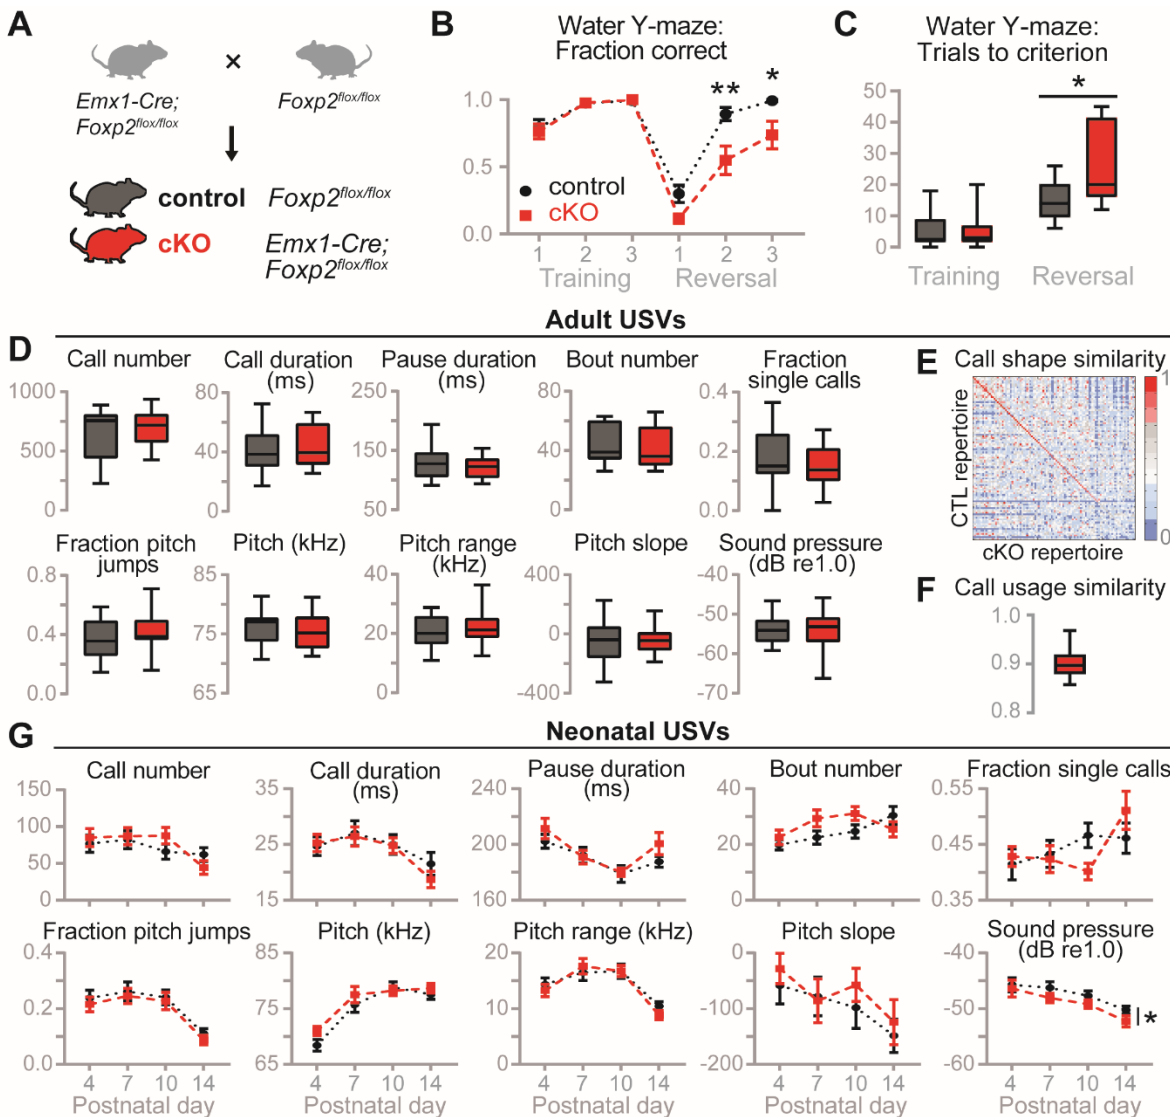

336

337 **Figure 1. *Foxp2* cKO mice show behavioral inflexibility but normal vocalizations.**  
 338 (A) Breeding scheme to generate control (*Foxp2<sup>fllox/fllox</sup>*) and *Foxp2* cKO (*Emx1-Cre;*  
 339 *Foxp2<sup>fllox/fllox</sup>*) littermate mice. (B-C) Reversal learning in water Y-maze.  $n = 10-17$  per  
 340 condition. (B) Fraction of correct trials. Data are shown as means ( $\pm$ SEM). (\*)  $P < 0.05$ ,  
 341 (\*\*)  $P < 0.01$ , two-way ANOVA with Bonferroni's multiple comparisons test. (C) Number  
 342 of trials to criterion. Box shows 25-75 percentiles, whiskers show min-max. (\*)  $P < 0.05$ ,  
 343 t-test. (D-G) Analysis of USVs. (D) Adult courtship USVs. Box shows 25-75 percentiles,



344 whiskers show min-max.  $n = 14-15$  per condition. (E) Call shape similarity matrix between  
345 adult control and cKO USV repertoires (size 100). Scale represents Pearson correlation  
346 coefficient. (F) Call usage similarity of adult cKOs compared to controls. Box shows 25-  
347 75 percentiles, whiskers show 5-95 percentiles. (G) Neonatal isolation USVs. Data are  
348 represented as means ( $\pm$ SEM). (\*)  $P < 0.05$ , two-way ANOVA with Bonferroni's multiple  
349 comparisons test.  $n = 34-42$  per condition. Full statistical analysis can be found in  
350 Supplemental Table 2.  
351

## 352 **Cortical *Foxp2* is dispensable for lamination and layer 6 axon targeting**

353 We asked whether abnormalities of corticogenesis could underlie the cognitive  
354 deficits in our *Foxp2* cKO mice. Because acute knockdown of *Foxp2* in embryonic cortex  
355 was shown to impair neuronal migration (Tsui et al. 2013), we examined cortical layering  
356 in cKO mice using DAPI staining of cytoarchitecture and immunohistochemistry for layer  
357 markers CUX1 (L2-4), CTIP2 (L5b) and TBR1 (L6). We found no gross abnormalities in  
358 layer formation or relative thickness at P7 (Supplemental Fig. 3A-B, statistics for  
359 immunohistochemistry are provided Supplemental Table 2). Next, because *Foxp2*  
360 regulates genes involved in axon outgrowth and guidance in embryonic brain (Vernes et  
361 al. 2011), we examined the formation of cortical L6 axon tracts labeled with *golli*- $\tau$ -eGFP  
362 in P14 cKO mice (Jacobs et al. 2007) (Supplemental Fig. 3C). We observed normal  
363 formation of L6 axon tracts (including the internal capsule, which contains corticothalamic  
364 axons), innervation of thalamic nuclei, and intra-cortical axon and dendrite projections to  
365 L4 (Supplemental Fig. 3D). These results confirm other recent findings that *Foxp2*  
366 deletion from cortical progenitors and/or neurons does not affect gross cortical layering  
367 or targeting of L6 axons (Kast et al. 2019; Medvedeva et al. 2018).

## 368 **Cortical *Foxp2* deletion reduces dopamine signaling gene expression**

369 FoxP2 has been shown to regulate expression of the dopamine D1 receptor (D1R)  
370 and its downstream effector DARPP-32 in zebra finch striatum (Murugan et al. 2013).

371 Given the long-established link between prefrontal cortical dopamine and behavioral  
372 flexibility (Ott and Nieder 2019), we explored the possibility that *Foxp2* deletion impairs  
373 reversal learning through dysregulation of cortical dopamine signaling. In cortical L6,  
374 *Foxp2*-expressing corticothalamic projection neurons (CThPNs) are all reported to  
375 express DARPP-32, and *Foxp2* directly binds the promoter of its gene *Ppp1r1b* in  
376 embryonic brain (Hisaoka et al. 2010; Vernes et al. 2011). Retrograde labeling has shown  
377 that L6 CThPNs express D1R (Gaspar et al. 1995), and while no studies to date have  
378 shown colocalization of *Foxp2* and D1R in the cortex, these proteins are highly  
379 coexpressed in striatonigral spiny projection neurons (Vernes et al. 2011). Thus, we  
380 hypothesized that *Foxp2* activates D1R and DARPP-32 expression in mouse L6 CThPNs.

381 To visualize D1R and DARPP-32 expression, we crossed our *Foxp2* cKO mice  
382 with *Drd1a*-tdTomato BAC reporter mice, which replicate endogenous D1R expression  
383 patterns in the cortex, and performed immunohistochemistry at adult and neonatal stages  
384 (Ade et al. 2011; Anastasiades et al. 2018). In adult control frontal cortex, DARPP-32  
385 expression closely followed that of *Foxp2* in layer 6, but D1R was almost exclusively  
386 expressed in *Foxp2*-negative neurons (Fig. 2B). In agreement with recent studies in  
387 *Drd1a*-tdTomato mouse cortex (Anastasiades et al. 2018), this indicates that mature D1R-  
388 expressing neurons are predominantly ITPNs rather than *Foxp2*/DARPP-32-expressing  
389 CThPNs. Unexpectedly, however, cortical *Foxp2* deletion caused a large reduction in  
390 D1R-positive cells throughout the adult cortex (Fig. 2B). Thus, cortical *Foxp2* is required  
391 for proper D1R expression in mature ITPNs.

392 In the prefrontal cortex, expression of D1/D1-like receptors is developmentally  
393 regulated, with higher expression during earlier stages of development (Andersen et al.

394 2000; Cullity et al. 2018). Thus, we examined expression of D1R, DARPP-32, and Foxp2  
395 in early postnatal frontal cortex of control and *Foxp2* cKO mice. In contrast with adult  
396 control cortex, postnatal control cortex showed a high density of D1R-expressing cells  
397 and extensive coexpression of D1R, DARPP-32, and Foxp2 in L6 neurons (Fig. 2B).  
398 Again, upon cortical *Foxp2* deletion, we saw a vast reduction of D1R+ cells throughout  
399 the frontal cortex (Fig. 2B). Quantification of D1R+ cells by layer in the medial prefrontal  
400 cortex (mPFC) revealed significant reductions in L5 ( $33\pm 3.2\%$  vs.  $14\pm 2.8\%$ ) and L6  
401 ( $66\pm 3.9\%$  vs.  $25\pm 1.5\%$ ), layers where Foxp2 expression normally occurs (Fig. 2C,  
402 Supplemental Table 2). In addition, there was a 40% reduction in DARPP-32 protein  
403 content in postnatal *Foxp2* cKO cortex (Fig. 2D). These results indicate that in developing  
404 cortex, Foxp2 is required for normal expression of dopamine signaling molecules.

405 To determine whether the decrease in D1R expression in *Foxp2* cKO cortex was  
406 due to decreased CThPN density or downregulation of D1R in CThPNs, we examined the  
407 CThPN marker TLE4 (Molyneaux et al. 2015) and its coexpression with Foxp2 and D1R  
408 in mPFC. In control mice, we found a high degree of overlap among the three proteins in  
409 L6 and a moderate degree of overlap in L5 (Fig. 2E, Table 1). In *Foxp2* cKO mice, we  
410 saw no change in the percentage of TLE4-positive cells in L5 or L6, but there were  
411 significant reductions in TLE4/D1R-positive cells in these layers (Fig. 2E, Table 1). These  
412 results agree with recent findings of unaltered neuronal density in L5-6 of mice lacking  
413 *Foxp2* through the same conditional knockout strategy (French et al. 2018; Kast et al.  
414 2019). Interestingly, although nearly all (~92%) control TLE4-expressing neurons were  
415 Foxp2/D1R-positive, 41% of TLE4+ neurons maintained D1R expression after *Foxp2*  
416 deletion (Fig. 2E, Table 1), suggesting that D1R expression is regulated by Foxp2 in only

417 a subset of CThPNs. In summary, we found that postnatal but not adult CThPNs express  
 418 D1R, and that cortical *Foxp2* is required for proper D1R expression in postnatal CThPNs  
 419 and adult ITPNs.  
 420

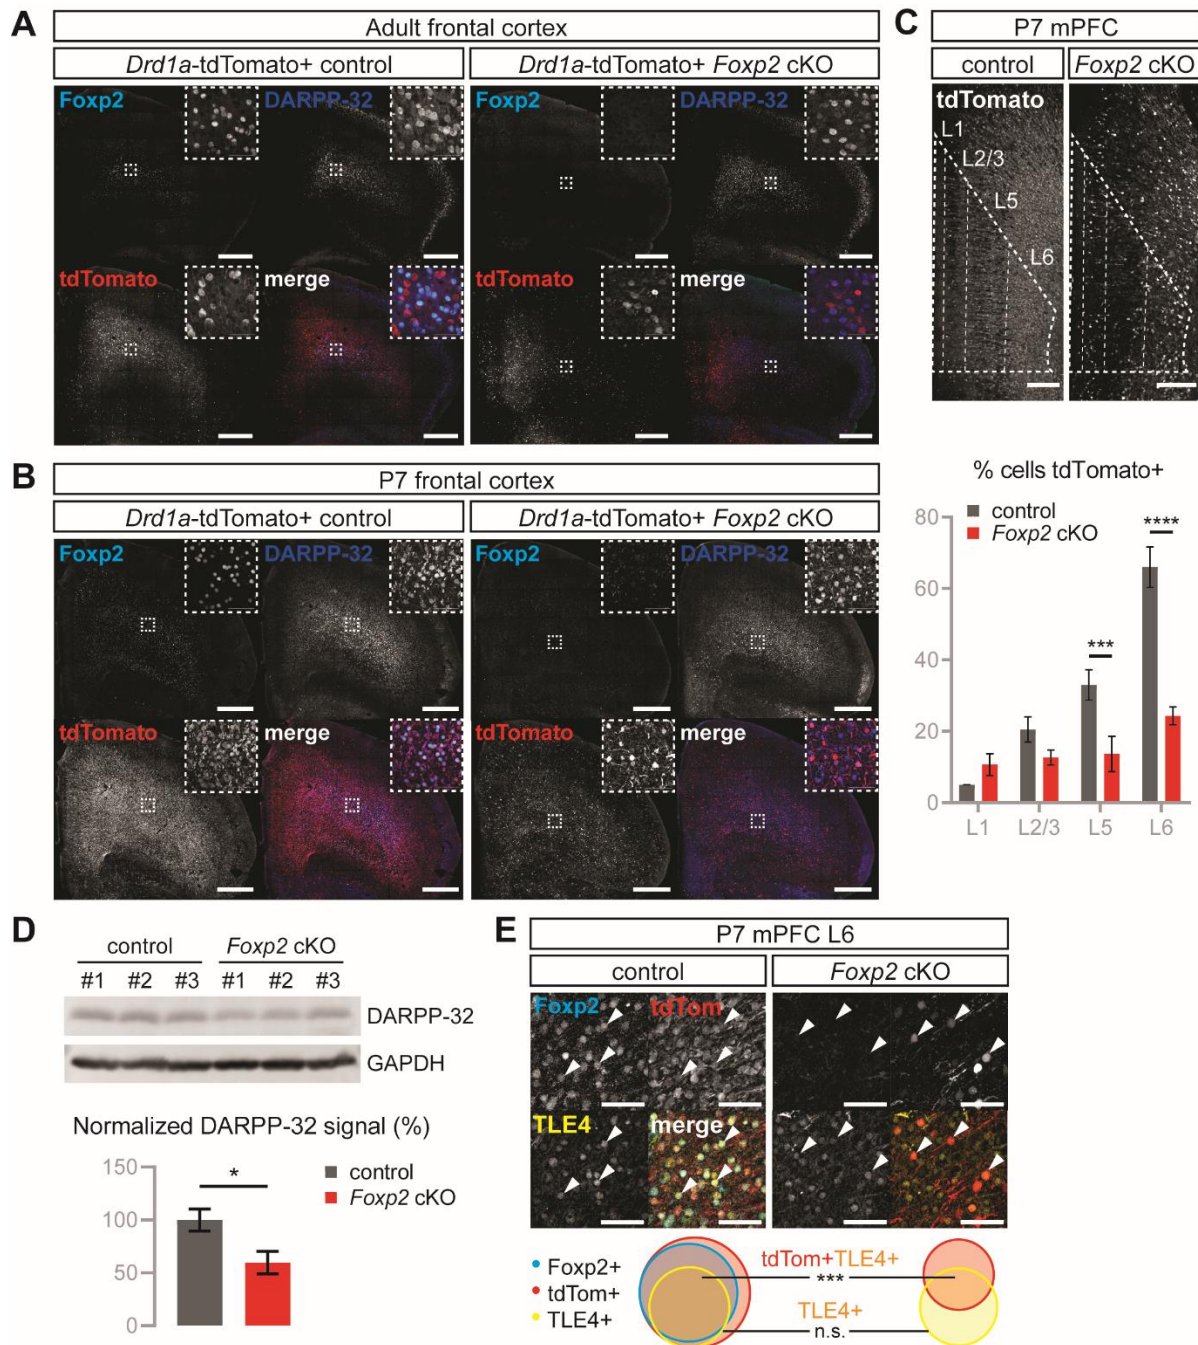

421

422 **Figure 2. *Foxp2* cKO mice show decreased dopamine signaling proteins in**  
 423 **postnatal and adult cortex.** (A) IHC for *Foxp2*, DARPP-32, and *Drd1a*-tdTomato in adult  
 424 control and *Foxp2* cKO frontal cortex. Scale bar: 500  $\mu$ m. (B) IHC for *Foxp2*, DARPP-32,  
 425 and *Drd1a*-tdTomato in P7 control and cKO frontal cortex. Scale bar: 500  $\mu$ m. (C) Top:  
 426 IHC for *Drd1a*-tdTomato in P7 control and cKO mPFC. Scale bar: 200  $\mu$ m. Bottom:  
 427 Percentage of DAPI+ cells expressing tdTomato per layer in P7 mPFC. Error bars  
 428 represent  $\pm$ SEM. (\*\*\*)  $P < 0.001$ , (\*\*\*\*)  $P < 0.0001$ , two-way ANOVA with Bonferroni's  
 429 multiple comparisons test.  $n = 2-3$  per condition. Full statistical analysis can be found in  
 430 Supplemental Table 2. (D) Top: Western blot for DARPP-32 and GAPDH loading control  
 431 from frontal cortical lysates of P7 control and cKO mice. Bottom: Western blot  
 432 quantification. DARPP-32 signals were normalized to GAPDH signals. Error bars  
 433 represent  $\pm$ SEM. (\*)  $P < 0.05$ , t-test.  $n = 3$  per condition. (E) Top: IHC for *Foxp2*, *Drd1a*-  
 434 tdTomato, and TLE4 in P7 control and cKO mPFC L6. Arrowheads indicate cells with  
 435 protein coexpression. Scale bar: 50  $\mu$ m. Bottom: Weighted Venn diagrams summarizing  
 436 *Foxp2*, *Drd1a*-tdTomato, and TLE4 coexpression in P7 control and cKO mPFC L6. (\*\*\*)  
 437  $P < 0.001$ , t-test.  $n = 2-3$  per condition. Full quantification and statistical analysis can be  
 438 found in Table 1.  
 439

440 **Table 1. Summary of *Foxp2*, tdTomato, and TLE4 coexpression in P7 mPFC.**

|                                   | Layer 5       |               |               | Layer 6      |              |               |
|-----------------------------------|---------------|---------------|---------------|--------------|--------------|---------------|
|                                   | CTL           | CKO           | Pval          | CTL          | CKO          | Pval          |
| % cells <i>Foxp2</i> +            | 14 $\pm$ 1.1  | -             | -             | 52 $\pm$ 3.3 | -            | -             |
| % cells tdTom+                    | 33 $\pm$ 3.2  | 14 $\pm$ 2.8  | <b>0.0213</b> | 66 $\pm$ 3.9 | 25 $\pm$ 1.5 | <b>0.0014</b> |
| % cells TLE4+                     | 8.8 $\pm$ 1.7 | 8.3 $\pm$ 0.7 | 0.7605        | 35 $\pm$ 1.7 | 32 $\pm$ 2.4 | 0.4326        |
| % <i>Foxp2</i> + also tdTom+      | 63 $\pm$ 1.4  | -             | -             | 99 $\pm$ 1.1 | -            | -             |
| % <i>Foxp2</i> + also TLE4+       | 38 $\pm$ 3.5  | -             | -             | 62 $\pm$ 0.2 | -            | -             |
| % tdTom+ also <i>Foxp2</i> +      | 28 $\pm$ 5.3  | -             | -             | 79 $\pm$ 0.7 | -            | -             |
| % TLE4+ also <i>Foxp2</i> +       | 62 $\pm$ 2.1  | -             | -             | 93 $\pm$ 1.6 | -            | -             |
| % TLE4+ also tdTom+               | 100 $\pm$ 0   | 30 $\pm$ 6.4  | <b>0.0034</b> | 99 $\pm$ 0.8 | 41 $\pm$ 3.2 | <b>0.0008</b> |
| % TLE4+ also <i>Foxp2</i> +tdTom+ | 62 $\pm$ 2.1  | -             | -             | 92 $\pm$ 0.8 | -            | -             |

441 Data are represented as means $\pm$ SEM. Genotypes were compared using t-tests.  $n = 2-3$   
 442 per condition.  
 443



#### 444 **Identification of D1R-expressing cell types in developing frontal cortex**

445       Studies using retrograde labeling and genetic markers have identified excitatory  
446 and inhibitory neuronal subtypes expressing D1R in adult mouse mPFC (Anastasiades  
447 et al. 2018; Han et al. 2017), but less is known about cell types expressing D1R in  
448 developing cortex. To identify these cell types and understand cell type-specific effects of  
449 *Foxp2* deletion, we used fluorescence-activated cell sorting (FACS) followed by single-  
450 cell RNA-sequencing (scRNA-seq) to genetically profile *Drd1a*-tdTomato<sup>+</sup> frontal cortical  
451 neurons from P7 control and *Foxp2* cKO mice (Fig. 3A). Using the 10x Genomics  
452 Chromium platform (Zheng et al. 2017), we profiled a total of 7282 cells from 2 mice per  
453 genotype, detecting similar numbers of transcripts (median UMI/cell: control=8484,  
454 cKO=6832) and genes (median genes/cell: control=2678, cKO=2546) between  
455 genotypes (Supplemental Fig. 4A). Using Seurat (Butler et al. 2018) we identified 21  
456 clusters containing cells from all mice examined (Supplemental Fig. 4B-C, Supplemental  
457 Table 3), and we annotated cell types by overlapping our cluster marker genes with  
458 cluster markers from a published neonatal cortical scRNA-seq dataset (Loo et al. 2019).  
459 We identified multiple projection neuron, interneuron, and, unexpectedly, non-neuronal  
460 clusters from our *Drd1a*-tdTomato FACS-scRNA-seq (Supplemental Fig. 4B, D). While  
461 *Drd1* was not expressed in every cell, it was expressed in every cluster, and re-clustering  
462 *Drd1*<sup>+</sup> cells resulted in similar cell types as the full dataset (Supplemental Fig. 4E-F). As  
463 *tdTomato* transcripts are roughly double that of *Drd1* in individual cells of *Drd1a*-tdTomato  
464 mouse cortex (Anastasiades et al. 2018), we posited that FACS isolated tdTomato<sup>+</sup> cells  
465 for which we could not detect *Drd1* transcripts by scRNA-seq. Indeed, using sequence  
466 information from the BAC used to generate the *Drd1a*-tdTomato mice (Ade et al. 2011),

467 we found that *Drd1a*-tdTomato BAC expression is enhanced relative to endogenous *Drd1*  
468 expression (Supplemental Fig. 4G). Thus, *Drd1* transcripts appear to be present in both  
469 neurons and glia of the developing frontal cortex.

470 To refine our D1R neuronal subtype classification, we reclustered the neuronal  
471 clusters and identified 11 clusters comprised of 2758 cells (Fig. 3B, Supplemental Table  
472 3). Two low-quality clusters (Clusters 2, 7) were excluded from further assessments, and  
473 annotation of the remaining clusters based on P0 data revealed multiple subclasses of  
474 upper- and lower-layer projection neurons and interneurons (Loo et al. 2019) (Fig. 3C).  
475 To delineate projection neuron clusters by their projection specificity, we also examined  
476 expression of marker genes from a scRNA-seq dataset with retrograde labeling in adult  
477 frontal motor cortex (Tasic et al. 2018) (Fig. 3D). We were able to distinguish L6 CThPNs  
478 by *Foxp2*, *Tle4*, and *Ephb1* (Cluster 4), L5 near-projecting neurons (NPNs) by *Trhr* and  
479 *Tshz2* (Cluster 9), L6 ITPNs by *Oprk1* (Cluster 10), and L2/3 ITPNs by *Mdga1* and *Pou3f1*  
480 (Cluster 3). Cluster 0 may contain a mix of L2/3 and L5 ITPNs as indicated by expression  
481 of both *Pou3f1* and the L5 ITPN marker *Rorb*. Among projection neurons, *Foxp2*  
482 expression was restricted to L6 CThPNs and the newly described L5 NPNs, which do not  
483 have long-range projections (Tasic et al. 2018) (Fig. 3D). We also distinguished  
484 interneuron subtypes in our scRNA-seq data by expression of *Htr3a* (Cluster 1), *Lamp5*  
485 (Cluster 6), and *Sst* (Cluster 8). These results reveal an unprecedented diversity of D1R-  
486 expressing neuronal subtypes in the developing frontal cortex, and they identify L5 NPNs  
487 as *Foxp2*-expressing cell types in addition to L6 CThPNs.

488 ***Foxp2* deletion increases SP9+ interneurons in postnatal cortex**

489           Given that postnatal *Foxp2* cKO mice show reduced D1R expression in CThPNs,  
490 but by adulthood show reduced D1R expression in ITPNs, we asked if this potential non-  
491 cell-autonomous effect was occurring during development. By examining the proportion  
492 of cKO cells in each D1R neuronal cluster, we found significant underrepresentation of  
493 cKO cells in L6 CThPN and L2/3 ITPN clusters, and overrepresentation in interneuron  
494 Cluster 5 (Fig. 3E). Cluster 5 overlapped significantly with a P0 cluster annotated as  
495 migrating cortical interneurons, and these cells expressed high levels of *Cdca7* and *Sp9*  
496 while expressing lower levels of mature interneuron subtype markers (Loo et al. 2019)  
497 (Fig. 3C-D). Cluster 5 also expressed *Foxp2*, suggesting it arises from an *Emx1*-negative  
498 lineage such as basal forebrain-derived cortical interneurons (Gorski et al. 2002) (Fig.  
499 3D). Immunohistochemistry for SP9 in *Foxp2* cKO mPFC confirmed this increase in total  
500 SP9+ cells as well as SP9+D1R+ cells upon *Foxp2* deletion, suggesting the presence of  
501 an ectopic population of interneurons in cKO mice (Fig. 3F-G, Supplemental Table 2).  
502 Thus, in postnatal frontal cortex, loss of *Foxp2* in *Emx1*-positive cells causes non-cell-  
503 autonomous effects on ITPN D1R expression and cortical interneuron numbers.



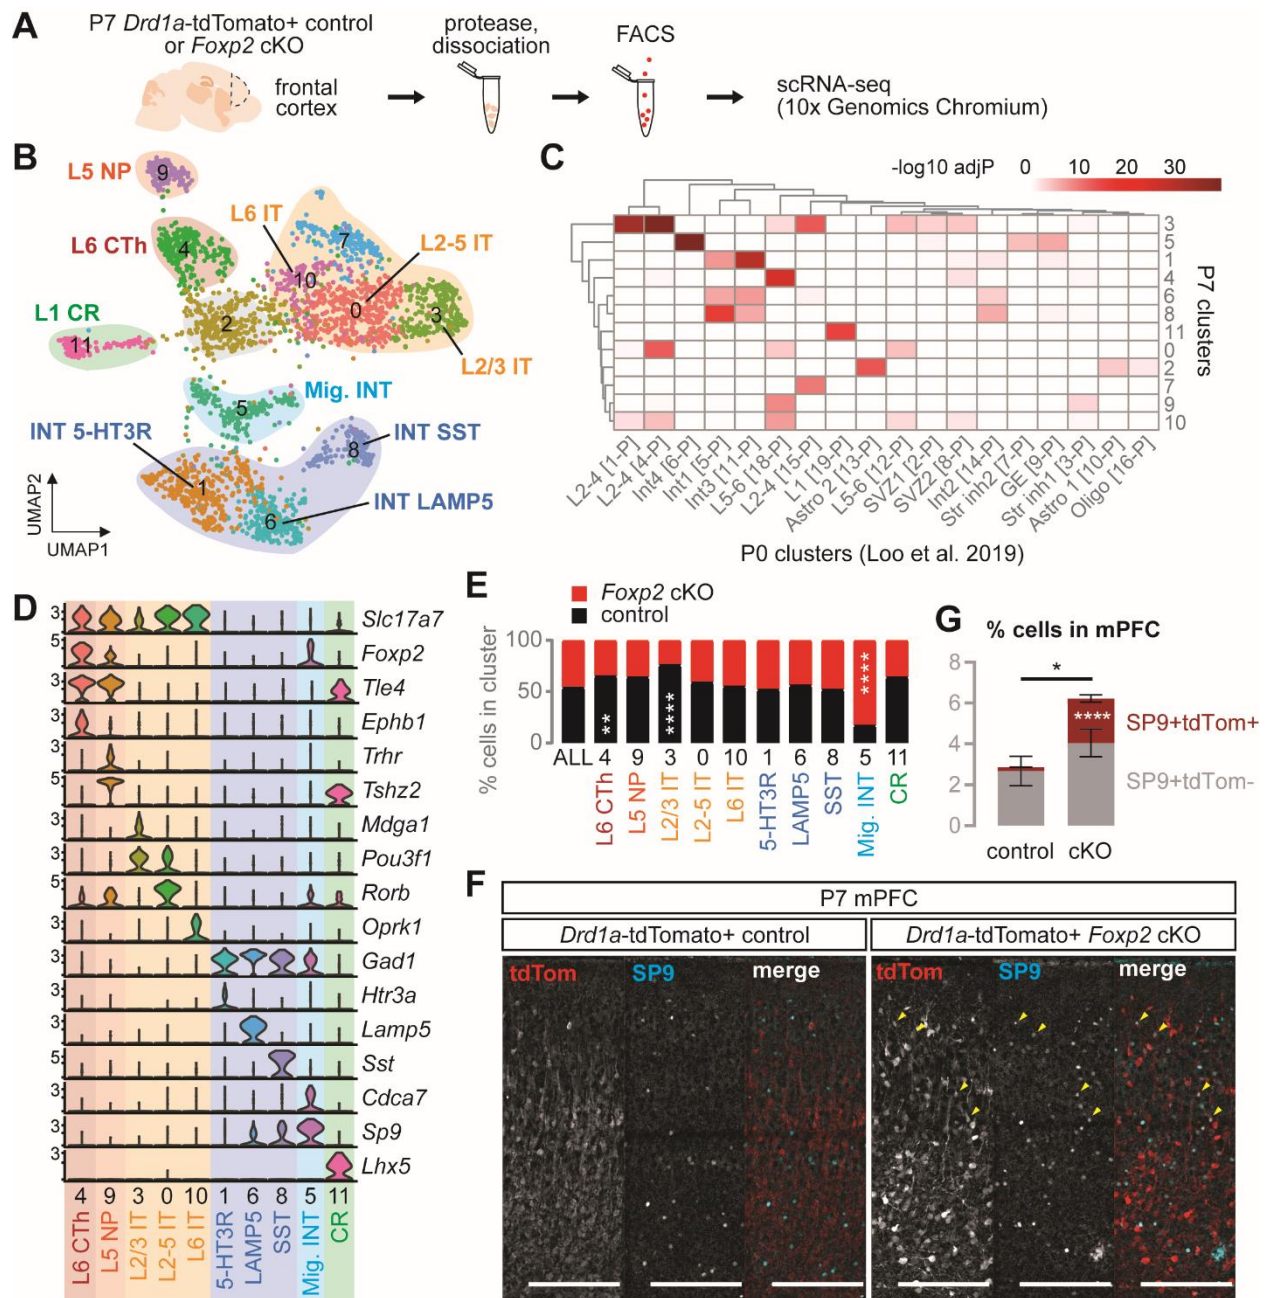

504

505 **Figure 3. *Foxp2* cKO mice show altered composition of dopamine D1 receptor-**  
 506 **expressing neuronal subtypes.** (A) Experimental design for D1R scRNA-seq.  $n = 2$  per  
 507 condition. (B) UMAP projection of clusters with neurons combined from both genotypes.  
 508 (C) Hypergeometric overlaps of neuronal cluster marker genes with P0 mouse cortex  
 509 cluster marker genes from Loo et al 2019. (D) Violin plots of selected marker genes. Y-  
 510 axes show log-scaled expression. (E) Percentage of control and cKO cells per cluster.  
 511 (\*\*  $P < 0.01$ , \*\*\*\*  $P < 0.0001$ , Fisher's exact test with Benjamini-Hochberg post-hoc test.  
 512 (F) IHC for tdTomato and SP9 in P7 control and cKO mPFC. Pial surface is at the top.  
 513 Arrowheads indicate cells expressing both proteins. Scale bar: 200  $\mu\text{m}$ . (G) Percentage  
 514 of cells expressing SP9  $\pm$  tdTomato in P7 control and cKO mPFC. Data are represented

515 as means $\pm$ SEM. (\*)  $P < 0.05$ , (\*\*\*\*)  $P < 0.0001$ , t-test.  $n = 3-4$  per condition. CR: Cajal-  
516 Retzius, CTh: corticothalamic, INT: interneuron, IT: intratelencephalic, Mig INT: migrating  
517 interneuron, NP: near-projecting.

518

### 519 ***Foxp2* deletion induces non-cell-autonomous effects on cortical gene expression**

520 To elucidate molecular pathways in cortical D1R neurons affected by *Foxp2*  
521 deletion, we performed “pseudo-bulk RNA-seq” differential gene expression analyses  
522 between genotypes in our scRNA-seq data. First, we identified differentially expressed  
523 genes (DEGs) between all control neurons and all *Foxp2* cKO neurons and found 48  
524 downregulated and 35 upregulated DEGs in cKO neurons (Fig. 4A-B, Supplemental  
525 Table 4). In agreement with our immunohistochemistry data, we saw decreased  
526 expression of *Foxp2*, *Drd1*, and *Ppp1r1b* (which encodes DARPP-32) in cKO neurons  
527 (Figure 2, Supplemental Table 4). Overlap of these DEGs with our neuronal cluster  
528 markers revealed enrichment of downregulated genes in projection neurons and  
529 enrichment of upregulated genes in interneurons (Fig. 4C). Summarized gene ontology  
530 (GO) terms associated with downregulated DEGs indicated abnormal synaptic plasticity,  
531 dopamine signaling, projection organization, and microtubule-based processes in cKO  
532 neurons (Fig. 4D, Supplemental Table 4). Summarized GO terms for upregulated DEGs  
533 were consistent with and likely driven by the ectopic immature interneuron Cluster 5,  
534 which was comprised of more cKO neurons than control neurons (Fig. 3E-G, Fig. 4D,  
535 Supplemental Table 4).

536 In a differential gene expression approach less driven by imbalanced cell type  
537 proportions between genotypes, we also identified DEGs within each neuronal cluster  
538 (Fig. 4E, Supplemental Table 5). L6 CThPNs and L5 NPNs in cKO mice showed  
539 surprisingly few gene expression changes, but we confirmed *Ppp1r1b* as a CThPN-

540 specific downregulated DEG (Fig. 4F). This relatively small number of DEGs in *Foxp2*-  
541 expressing neurons was not due to upregulation of related genes *Foxp1* or *Foxp4* (Fig.  
542 4G). In contrast, L2-5 ITPN clusters showed a greater number of DEGs, including  
543 downregulation of genes encoding the cytoskeletal proteins  $\beta$ -actin (*Actb*) and  $\beta$ -tubulin  
544 (*Tubb5*) (Fig. 4F). To confirm these decreases, we performed immunohistochemistry for  
545  $\beta$ -actin and  $\beta$ -tubulin in P7 control and *Foxp2* cKO cortex and saw decreased expression  
546 of both proteins across the cortical mantle (Fig. 4H, Supplemental Table 2). Thus, while  
547 *Foxp2* expression is restricted to deep-layer non-ITPNs, its deletion causes non-cell-  
548 autonomous changes including cytoskeletal gene downregulation in upper-layer ITPNs.

549         Next, to overcome the differential sampling of cell types between genotypes due  
550 to *Foxp2* regulation of *Drd1a*-tdTomato, we generated an independent FACS-scRNA-seq  
551 dataset from mice expressing the *golli*- $\tau$ -eGFP (GTE) reporter, which is expressed in  
552 control *Foxp2*-positive CThPNs but not decreased in cKO cortex (Supplemental Fig. 5A-  
553 B). Using similar analysis methods as with the *Drd1a*-tdTomato dataset, we identified  
554 projection neuron clusters and calculated pseudo-bulk RNA-seq DEGs between  
555 genotypes, 24 of which were downregulated in cKO and 23 upregulated (Supplemental  
556 Fig. 5C-F, Supplemental Table S6). Summarized GO terms associated with  
557 downregulated DEGs were related to neuronal projection organization and synaptic  
558 signaling, similar to the downregulated GO terms in the *Drd1a*-tdTomato dataset  
559 (Supplemental Fig. 5G, Supplemental Table S6). Notably, *Actb* appeared among the  
560 downregulated DEGs in both datasets (Supplemental Fig. 5H, Supplemental Table S6).  
561 In summary, cortical *Foxp2* deletion induces both cell-autonomous and non-cell-

562 autonomous decreases in dopamine-related, synaptic, and projection-related gene  
 563 expression.

564

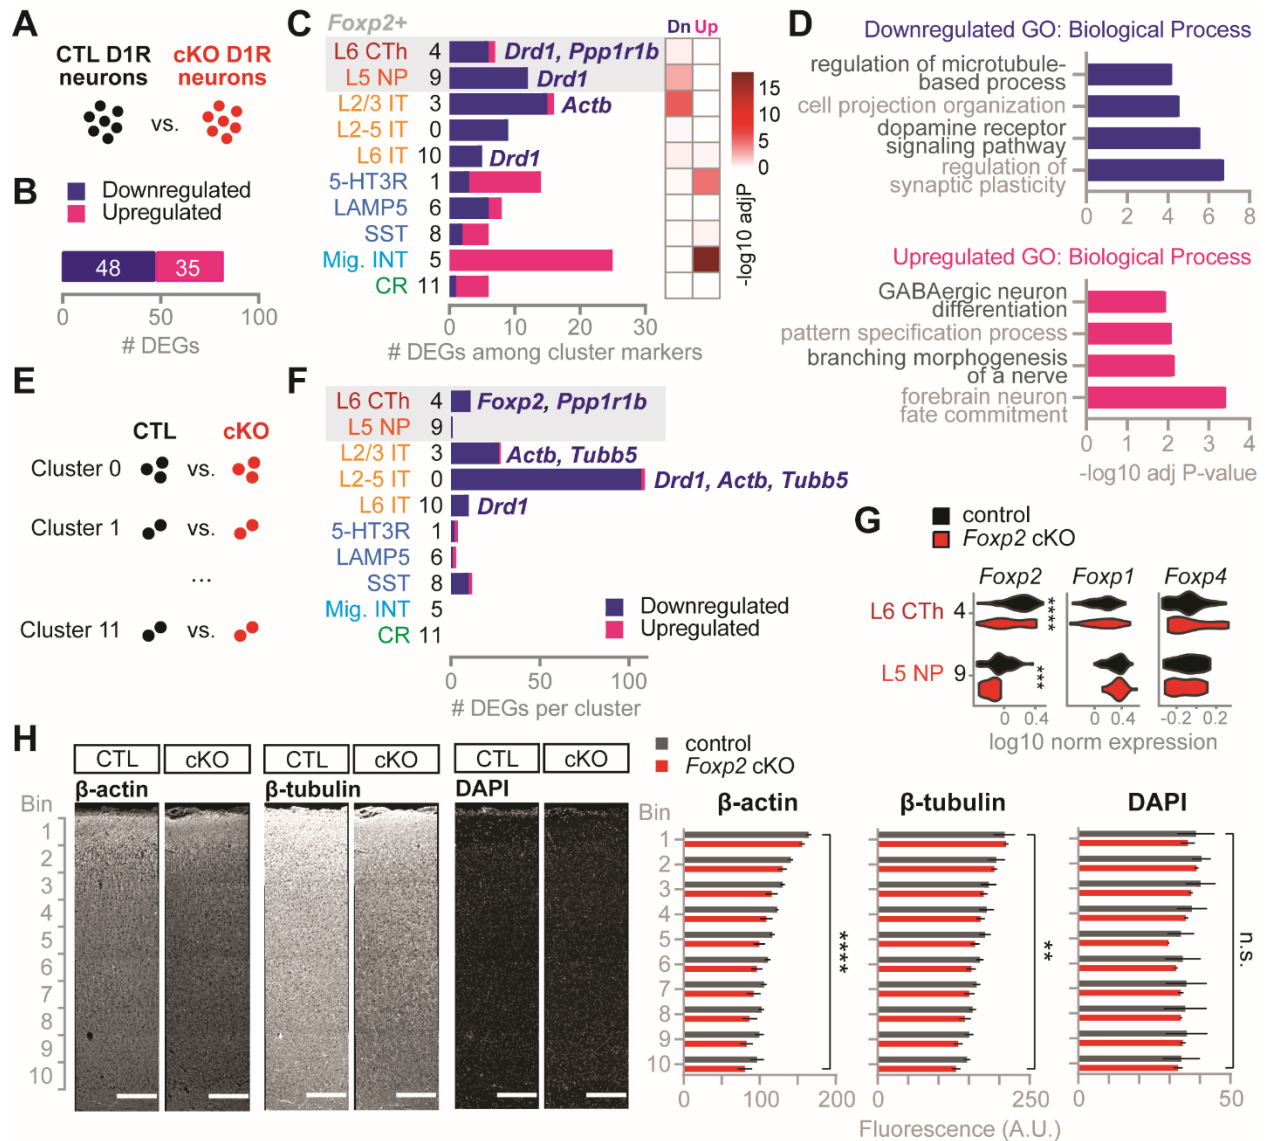

565

566 **Figure 4. Cortical *Foxp2* deletion induces non-cell-autonomous dysregulation of**  
 567 **cytoskeletal genes.** (A) Identification of differentially expressed genes (DEGs) between  
 568 all control and all *Foxp2* cKO neurons from D1R scRNA-seq. (B) Number of DEGs  
 569 significantly down- or upregulated in cKO neurons. (C) Number (left) and hypergeometric  
 570 enrichment (right) of DEGs among neuronal cluster marker genes. Gray shaded area  
 571 indicates clusters with *Foxp2* enrichment. (D) Summarized gene ontology (GO) Biological  
 572 Process terms for down- and upregulated DEGs. (E) Analysis of DEGs by cluster between  
 573 control and cKO neurons. (F) Number of DEGs per cluster with selected genes shown.



574 Gray shaded area indicates clusters with *Foxp2* enrichment. (G) Violin plots of *Foxp* gene  
575 expression in clusters with *Foxp2* enrichment. (\*\*\*)  $P < 0.001$ , (\*\*\*\*)  $P < 0.0001$ , Wilcoxon  
576 rank sum test. (H) Left: IHC for  $\beta$ -actin and  $\beta$ -tubulin in P7 control and cKO motor cortex.  
577 Right: Quantification of fluorescence intensity averaged by cortical bin. Data are  
578 represented as means $\pm$ SEM. (\*\*)  $P < 0.01$ , (\*\*\*\*)  $P < 0.0001$ , two-way ANOVA with  
579 Bonferroni's multiple comparisons test.  $n = 3$  per condition.

580

581

## 582 **Putative direct targets of *Foxp2* in postnatal cortex**

583 In another approach to identify *Foxp2* targets in a manner uninfluenced by altered  
584 *Drd1a*-tdTomato expression in *Foxp2* cKO cortex, we searched for genes correlated (i.e.  
585 activated targets) or anticorrelated (i.e. repressed targets) with *Foxp2* expression across  
586 control neurons in the *Drd1a*-tdTomato dataset (Fig. 5A, Supplemental Table 7). To  
587 identify potential direct targets, we overlapped these genes with targets from a *Foxp2*  
588 promoter-binding assay performed in embryonic mouse brain (Vernes et al. 2011). Then,  
589 to determine their cell type-specificity, we overlapped these putative direct *Foxp2* targets  
590 with the *Drd1a*-tdTomato neuronal cluster markers (Fig. 5B). We found shared and  
591 distinct *Foxp2*-activated targets between CThPNs and NPNs, several of which may exert  
592 non-cell-autonomous effects through extracellular matrix organization (*Col23a1*, *P4ha1*),  
593 cell-cell signaling (*Islr2*, *Plxna2*, *Sdk1*), or synaptic activity (*Cacna1a*, *Calm2*, *Cbln1*,  
594 *Grm3*, *Lrrtm2*) (Fig. 5B). We also identified *Foxp2*-repressed targets, which were markers  
595 for ITPNs, interneurons, and CR cells, suggesting that *Foxp2* plays a role in repressing  
596 these identities in CThPNs and NPNs (Fig. 5B). These results provide potential  
597 mechanisms by which *Foxp2* may exert non-cell-autonomous effects and contribute to  
598 the maintenance of deep-layer cortical projection neuron identity.

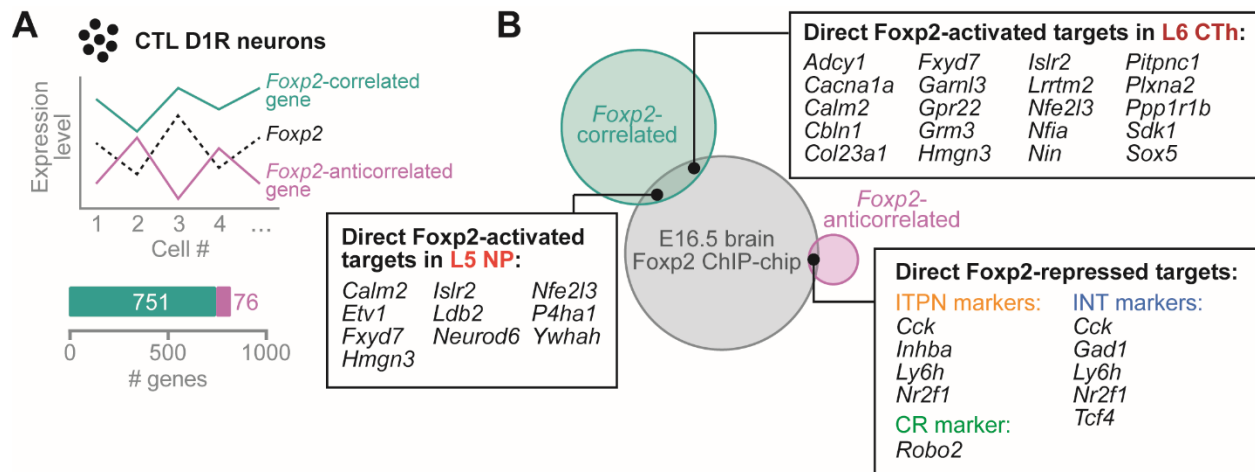

599

600 **Figure 5. Identification of genes directly regulated by Foxp2 in the cortex.** (A) Top:  
 601 Analysis of genes correlated or anticorrelated with *Foxp2* expression across control  
 602 neurons from D1R scRNA-seq. Bottom: Number of *Foxp2*-correlated or -anticorrelated  
 603 genes. (B) Overlap of *Foxp2*-correlated or -anticorrelated genes with embryonic brain  
 604 Foxp2 ChIP-chip targets from (Vernes et al. 2011) and with neuronal cluster marker  
 605 genes. CR: Cajal-Retzius, CTh: corticothalamic, INT: interneuron, IT: intratelencephalic,  
 606 Mig INT: migrating interneuron, NP: near-projecting.  
 607

## 608 Discussion

### 609 *Foxp2*-regulated cortical dopamine signaling and behavioral flexibility

610 We have demonstrated specific roles for cortical *Foxp2* in reversal learning, a form  
 611 of behavioral flexibility, and cortical dopamine D1R signaling throughout the postnatal  
 612 lifespan (Fig. 6). Cortical dopamine signaling regulates many cognitive functions,  
 613 including behavioral flexibility (Floresco 2013; Ott and Nieder 2019), and specific  
 614 manipulations of cortical D1R signaling or D1R-D2R interactions can modulate reversal  
 615 learning ability (Calaminus and Hauber 2008; Mizoguchi et al. 2010; Thompson et al.  
 616 2016). Thus, we suggest that the reversal learning deficits in *Foxp2* cKO mice arise from  
 617 their decreased expression of cortical dopamine D1 receptors. Other studies linking  
 618 *Foxp2* to cognitive function and dopamine signaling found that humanized *Foxp2* mice  
 619 demonstrate enhanced strategy set-shifting, another form of behavioral flexibility, and

620 altered frontal cortical dopamine concentrations (Enard et al. 2009; Schreiweis et al.  
621 2014). Furthermore, specific knockdown of *Drd1* in the prefrontal cortex impairs strategy  
622 set-shifting (Cui et al. 2018). Interestingly, we only observed significant deficits in  
623 cognitive function in the water Y-maze but not in the dry T-maze (Fig 1B-C, Supplemental  
624 Fig. 2A). Given that dopamine release in the frontal cortex is influenced by acute stress  
625 (Arnsten 2009), the potential D1R-mediated cognitive impairments in *Foxp2* cKO mice  
626 could be exacerbated in aversive tasks such as the water Y-maze.

627         Cortical *Foxp2* may mediate flexible behaviors through multiple circuit pathways in  
628 the brain. Recent optogenetic experiments have demonstrated involvement of both  
629 corticothalamic and corticostriatal neurons in probabilistic reversal learning (Nakayama  
630 et al. 2018). Thus, the reversal learning deficits in *Foxp2* cKO mice may be due to  
631 dysregulation of *Drd1* or other genes in CThPNs and ITPNs (Fig. 4), the latter of which  
632 encompass corticostriatal neurons. In addition, the hippocampus is known to have a  
633 prominent role in reversal learning in rodents and humans (Mala et al. 2015; Vila-Ballo et  
634 al. 2017). While *Foxp2* protein has limited expression in the hippocampus (Supplemental  
635 Fig. 1), we cannot rule out the possibility that loss of *Foxp2* in the cortex might ultimately  
636 affect hippocampal function through disruption to brain circuitry.

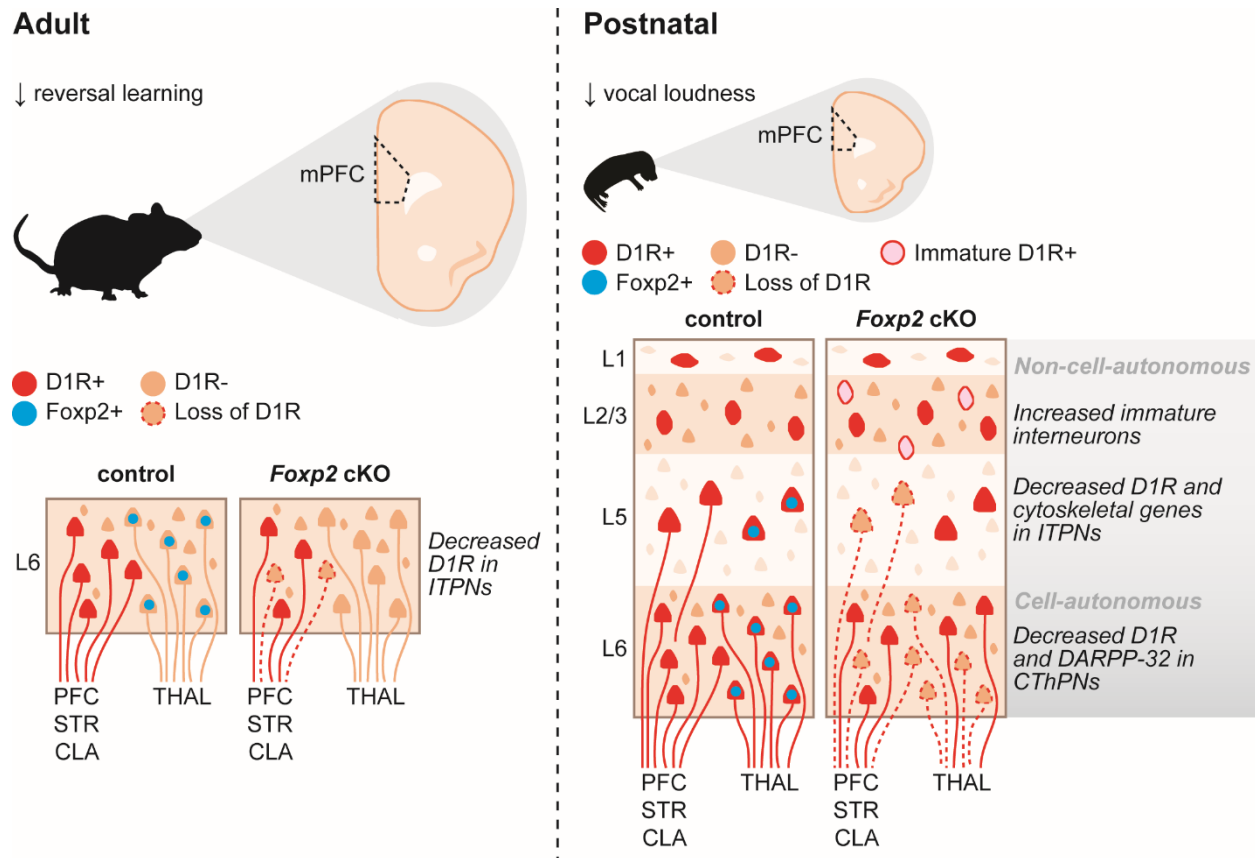

637

638 **Figure 6. Summary of behavioral and molecular findings in *Foxp2* cKO mice.** CLA:  
 639 claustrum, CThPNs: corticothalamic projection neurons, D1R: dopamine D1 receptor,  
 640 ITPNs: intratelencephalic projection neurons, L: layer, mPFC: medial prefrontal cortex,  
 641 STR: striatum, THAL: thalamus.

642

### 643 Genetic diversity of dopaminoceptive cell types in developing cortex

644 Studies spanning over two decades, reviewed in (Anastasiades et al. 2018), have  
 645 identified diverse neuronal subtypes expressing dopamine D1 receptors in the adult  
 646 cortex. However, much less is known about cell types expressing D1R in the developing  
 647 cortex, despite reports of postnatal regulation of D1R expression in this region (Andersen  
 648 et al. 2000; Brenhouse et al. 2008; Cullity et al. 2018; Tarazi et al. 1999). To better  
 649 understand the effects of *Foxp2* deletion on developing D1R neuronal subtypes, we  
 650 conducted the first cell type characterizations of *Drd1a*-tdTomato postnatal frontal cortex



651 (Ade et al. 2011). A recent study of these mice in adulthood found extensive expression  
652 of D1R in ITPNs but limited expression in CThPNs (Anastasiades et al. 2018), a finding  
653 corroborated by the absence of D1R in adult *Foxp2*-expressing CThPNs (Fig. 2A). In stark  
654 contrast, we found a high degree of D1R expression in both CThPNs and ITPNs of  
655 postnatal frontal cortex via immunostaining and single-cell transcriptomics (Fig. 2E, Fig.  
656 3B). Similarly, both adult and postnatal cortex show D1R expression in 5HT3R and  
657 calretinin-expressing (L1 CR) interneuron subtypes, but only postnatal cortex shows D1R  
658 expression in somatostatin (SST)-positive interneurons (Anastasiades et al. 2018) (Fig.  
659 3B). These results suggest transient expression of D1R in certain cell types of postnatal  
660 frontal cortex, such as CThPNs and SST interneurons. Additionally, we identified glial  
661 expression of *Drd1* in our scRNA-seq data, supporting evidence for the presence of D1-  
662 like receptors in prefrontal cortical astrocytes (Liu et al. 2009; Vincent et al. 1993)  
663 (Supplemental Fig. 4). The developmental functions of these early D1R expression  
664 patterns in neurons and potentially glia remain an interesting area of study to be  
665 elucidated.

### 666 ***Foxp2* regulation of interneuron development in the cortex**

667 In addition to changes in dopamine gene expression, we found that cortical *Foxp2*  
668 deletion produced an ectopic population of D1R-expressing interneurons (Fig. 3E-G).  
669 These cells closely matched the gene expression signature of ganglionic eminence-  
670 derived migrating interneurons identified by cell type profiling of neonatal mouse cortex  
671 (Loo et al. 2019) (Fig. 3C). Control of interneuron migration by cortical *Foxp2* could  
672 explain the abnormal cell migration seen after *Foxp2* knockdown at E13/14, when *Foxp2*-  
673 expressing projection neurons have already migrated to the cortical plate and are

674 positioned to signal to incoming interneurons (Tsui et al. 2013). Intriguingly, *Emx1-Cre*-  
675 mediated cortical deletion of *Satb2*, another projection neuron-specific transcription  
676 factor, was also recently shown to influence the migration and connectivity of ganglionic  
677 eminence-derived interneurons in the cortex (Wester et al. 2019). Our results provide  
678 further evidence that cortical interneuron development depends on proper development  
679 and function of projection neurons.

680 Multiple mechanisms could contribute to excess migrating interneurons in *Foxp2*  
681 cKO cortex. Altered dopamine D1 signaling itself could promote over-migration of  
682 interneurons into the cortex from the ganglionic eminences, as pharmacological D1R  
683 modulation has been shown to guide interneuron migration in embryonic forebrain slice  
684 preparations (Crandall et al. 2007). Alternatively, altered dopamine sensitivity or  
685 cytoskeletal function of projection neurons may prevent activity-dependent apoptosis of  
686 early interneurons, which normally occurs around the postnatal time point examined in  
687 our study (Lim et al. 2018). Integration of these excess interneurons into frontal cortical  
688 circuits could then impair circuit function and lead to behavioral deficits. Indeed, 22q11  
689 deletion and *Plaur* mouse models of ASD also demonstrate abnormal interneuron number  
690 and positioning as well as reversal learning deficits (Bissonette et al. 2010; Meechan et  
691 al. 2013).

## 692 **Limited roles of cortical *Foxp2* in mouse vocalization**

693 Mice with *Foxp2* mutations commonly exhibit USV abnormalities (Castellucci et al.  
694 2016; Chabout et al. 2016; French and Fisher 2014; Gaub et al. 2016), which have been  
695 attributed to its functions in the striatum (Chen et al. 2016), cerebellum (Fujita-Jimbo and  
696 Momoi 2014; Usui et al. 2017b), and laryngeal cartilage (Xu et al. 2018). Cortical *Foxp2*

697 deletion using *Nex-Cre* was previously shown to alter adult USVs in a social context-  
698 dependent manner (Medvedeva et al. 2018), but in our study, *Emx1-Cre*-mediated  
699 deletion did not appear to impact adult courtship USVs (Fig. 1D-F). Several  
700 methodological differences may account for these discrepancies. *Nex-Cre* causes  
701 recombination around embryonic day (E) 11.5 in postmitotic projection neurons, whereas  
702 *Emx1-Cre* acts by E10.5 in both projection neurons and their progenitors (Goebbels et al.  
703 2006; Gorski et al. 2002). Thus, perhaps earlier deletion of *Foxp2* from the cortex induces  
704 developmental compensation in vocalization circuitry that cannot occur after postmitotic  
705 neuronal deletion. Another possibility is that the superovulated females used to elicit  
706 courtship calls in the previous study exposed differences between genotypes that we  
707 could not detect using females in a natural ovulation state. Furthermore, our analysis did  
708 not parse calls based on duration, direction, or size of pitch jumps as did the previous  
709 study, but our call repertoire analysis suggested high overall similarity between control  
710 and cKO vocalizations.

711 Neonatal isolation USVs were also largely unaffected by loss of cortical *Foxp2*,  
712 contrasting with the USV reductions in pups with cortical *Foxp1* deletion or cerebellar  
713 *Foxp2* knockdown (Usui et al. 2017a; Usui et al. 2017b) (Fig. 1G). Whereas *Foxp2* is  
714 expressed in CThPNs, *Foxp1* is likely expressed in callosal and corticostriatal neurons  
715 based on its coexpression with *Satb2* (Hisaoka et al. 2010; Sohur et al. 2014; Sorensen  
716 et al. 2015). Furthermore, cortical layering is altered in *Foxp1* cKO but not *Foxp2* cKO  
717 mice (Usui et al. 2017a). Thus, proper positioning and function of ITPNs and cerebellar  
718 output neurons may be more essential to USV production than CThPNs.

719 Cortical *Foxp2* deletion did decrease the sound pressure of USVs across postnatal  
720 development (Fig. 1G). Homozygous *Foxp2-R552H* mutant pups also emit quieter  
721 ultrasonic distress calls, which correlates with overall developmental delay of mutants  
722 (Gaub et al. 2010; Groszer et al. 2008). However, cortical *Foxp2* alone at least partly  
723 contributes to modulation of call loudness, as our cKO pups showed grossly normal  
724 development (Supplemental Fig. 2H-J). By adulthood, heterozygous *Foxp2-R552H*  
725 mutants emit abnormally loud courtship USVs and show ectopic positioning of L5  
726 laryngeal motor cortex neurons (Chabout et al. 2016; Gaub et al. 2016). Whether this  
727 neuronal population is altered in *Foxp2* cKO pups and contributes to call loudness  
728 remains to be explored. As to the possible contribution of dopamine D1 signaling to call  
729 loudness, very few studies have explored this area. Systemic D1-like receptor blockade  
730 during rat development has been shown to increase USV sound pressure at later  
731 postnatal ages, while blockade in adult rats recapitulates the abnormal laryngeal  
732 neurophysiology seen in Parkinson's-related hypophonia (Cuomo et al. 1987; Feng et al.  
733 2009). Whether USV loudness is modulated specifically by cortical D1Rs remains to be  
734 determined and would clarify the mechanisms by which *Foxp2* cKO pups emit quieter  
735 calls.

### 736 **Neurodevelopmental disorder gene regulation by *Foxp2* in the cortex**

737 *Foxp2* regulation of cortical dopamine signaling may inform our understanding and  
738 treatment of NDDs. *FOXP2* variation has recently been associated with ASD and ADHD  
739 (Demontis et al. 2019; Reuter et al. 2017; Satterstrom et al. 2019), and genetic  
740 perturbations of dopamine signaling have also been implicated in NDDs (Money and  
741 Stanwood 2013). *Foxp2* cKO mice phenocopy the decreased cortical dopamine gene

742 expression (*Drd1*, *Ppp1r1b*) and reversal learning impairments seen in 16p11.2 and *Tbr1*  
743 mouse models of ASD (Huang et al. 2014; Portmann et al. 2014; Yang et al. 2015),  
744 suggesting a possible convergent phenotype of dysregulated cortical dopamine signaling  
745 in NDDs affecting behavioral flexibility.

746         Several other *Foxp2*-regulated genes are of interest due to their connection with  
747 NDDs. Overlap of direct *Foxp2* targets with DEGs from *Tbr1* models of ASD reveals  
748 potential co-activated (*Adcy1*, *Cbln1*, *Grm3*, *Lrrtm2*, *Nfe2l3*, *Nfia*, *Nin*, *Sdk1*, *Ppp1r1b*,  
749 *Sox5*) and co-repressed (*Inhba*) genes by *Foxp2*-TBR1 interaction in the cortex (Bedogni  
750 et al. 2010; Deriziotis et al. 2014; Fazel Darbandi et al. 2018; Vernes et al. 2011). In  
751 addition, *Foxp2* expression was anticorrelated with the ASD gene *Mef2c* (Supplemental  
752 Table 7), which is directly repressed by *Foxp2* in the striatum to control wiring of cortical  
753 synaptic inputs (Chen et al. 2016). Furthermore, recently identified ADHD-associated loci  
754 include *Foxp2* as well as the *Foxp2*-correlated genes *Dusp6*, *Pcdh7*, and *Sema6d*, the  
755 last of which is a direct *Foxp2* target in the brain (Demontis et al. 2019; Vernes et al. 2011)  
756 (Supplemental Table 7). We note that our direct target analysis is limited to *Foxp2*-bound  
757 promoters in embryonic brain (Vernes et al. 2011), and recent evidence indicates that  
758 FOXP2 promotes chromatin accessibility at enhancers to regulate gene expression  
759 (Hickey et al. 2019). Thus, genome-wide targets of *Foxp2* must be identified at various  
760 developmental stages for a full understanding of its functions in the cortex, including the  
761 molecular mechanism of its regulation of D1R expression.

762         In summary, our work on cortical *Foxp2* represents a step forward in elucidating  
763 neural mechanisms underlying cognition and vocal communication. Importantly, we  
764 identified dysregulated molecular pathways upon cortical *Foxp2* deletion in the absence

765 of general cortical development abnormalities. Moreover, these findings provide insights  
766 into the etiology and treatment of *FOXP2*-related and other neurodevelopmental  
767 disorders affecting behavioral flexibility.

768

## 769 **Funding**

770 This work was supported by the National Institutes of Health (T32GM109776,  
771 TL1TR001104 to M.C., DC014702, DC016340, MH102603 to G.K.); the Autism Science  
772 Foundation (REG 15-002 to M.C.); the Simons Foundation (SFARI 573689, 401220 to  
773 G.K.); the James S. McDonnell Foundation (220020467 to G.K.); and the Chan  
774 Zuckerberg Initiative, an advised fund of the Silicon Valley Community Foundation (HCA-  
775 A-1704-01747 to G.K.).

776

## 777 **Acknowledgments**

778 Our sincerest thanks to: Peter Tsai, Maria Chahrour, Todd Roberts, Jane Johnson,  
779 Ashley Anderson, and Ana Ortiz for providing feedback on the manuscript; Dr. Shari  
780 Birnbaum at the UT Southwestern Rodent Behavior Core for collecting behavior data and  
781 contributing helpful advice; and Dr. Bernd Gloss for providing BAC sequence information  
782 for the *Drd1a*-tdTomato scRNA-seq analysis. We also thank the Neuroscience  
783 Microscopy, Whole Brain Microscopy, and Flow Cytometry Facilities at UT Southwestern.  
784 G.K. is a Jon Heighten Scholar in Autism Research at UT Southwestern.

785

786 **Author Contributions**

787 M.C. and G.K. designed the study. M.C. collected and analyzed behavior,  
788 immunohistochemistry, and scRNA-seq data, and wrote the manuscript. S.L.H. and A.K.  
789 performed bioinformatic analyses on scRNA-seq data. M.H. collected behavior data,  
790 maintained mouse lines, and performed genotyping.

791

792 **References**

- 793 Ade KK, Wan Y, Chen M, Gloss B, Calakos N. 2011. An improved bac transgenic  
794 fluorescent reporter line for sensitive and specific identification of striatonigral  
795 medium spiny neurons. *Frontiers in systems neuroscience*. 5:32.
- 796 Anastasiades PG, Boada C, Carter AG. 2018. Cell-type-specific d1 dopamine receptor  
797 modulation of projection neurons and interneurons in the prefrontal cortex.  
798 *Cerebral cortex* (New York, NY : 1991).
- 799 Andersen SL, Thompson AT, Rutstein M, Hostetter JC, Teicher MH. 2000. Dopamine  
800 receptor pruning in prefrontal cortex during the periadolescent period in rats.  
801 *Synapse* (New York, NY). 37(2):167-169.
- 802 Andrews S. 2010. Fastqc: A quality control tool for high throughput sequence data.
- 803 Araujo DJ, Anderson AG, Berto S, Runnels W, Harper M, Ammanuel S, Rieger MA,  
804 Huang HC, Rajkovich K, Loerwald KW et al. 2015. Foxp1 orchestration of asd-  
805 relevant signaling pathways in the striatum. *Genes & development*. 29(20):2081-  
806 2096.
- 807 Araujo DJ, Toriumi K, Escamilla CO, Kulkarni A, Anderson AG, Harper M, Usui N,  
808 Ellegood J, Lerch JP, Birnbaum SG et al. 2017. Foxp1 in forebrain pyramidal  
809 neurons controls gene expression required for spatial learning and synaptic  
810 plasticity. *The Journal of neuroscience : the official journal of the Society for*  
811 *Neuroscience*. 37(45):10917-10931.
- 812 Arnsten AFT. 2009. Stress signalling pathways that impair prefrontal cortex structure and  
813 function. *Nature reviews Neuroscience*. 10(6):410-422.
- 814 Bedogni F, Hodge RD, Elsen GE, Nelson BR, Daza RA, Beyer RP, Bammler TK,  
815 Rubenstein JL, Hevner RF. 2010. Tbr1 regulates regional and laminar identity of  
816 postmitotic neurons in developing neocortex. *Proceedings of the National*  
817 *Academy of Sciences of the United States of America*. 107(29):13129-13134.
- 818 Bissonette GB, Bae MH, Suresh T, Jaffe DE, Powell EM. 2010. Astrocyte-mediated  
819 hepatocyte growth factor/scatter factor supplementation restores gabaergic  
820 interneurons and corrects reversal learning deficits in mice. *The Journal of*  
821 *Neuroscience*. 30(8):2918-2923.
- 822 Brenhouse HC, Sonntag KC, Andersen SL. 2008. Transient d1 dopamine receptor  
823 expression on prefrontal cortex projection neurons: Relationship to enhanced



- 824 motivational salience of drug cues in adolescence. *The Journal of neuroscience* :  
825 the official journal of the Society for Neuroscience. 28(10):2375-2382.
- 826 Butler A, Hoffman P, Smibert P, Papalexi E, Satija R. 2018. Integrating single-cell  
827 transcriptomic data across different conditions, technologies, and species. *Nature*  
828 *biotechnology*. 36(5):411-420.
- 829 Calaminus C, Hauber W. 2008. Guidance of instrumental behavior under reversal  
830 conditions requires dopamine d1 and d2 receptor activation in the orbitofrontal  
831 cortex. *Neuroscience*. 154(4):1195-1204.
- 832 Castellucci GA, McGinley MJ, McCormick DA. 2016. Knockout of *foxp2* disrupts vocal  
833 development in mice. *Scientific reports*. 6:23305.
- 834 Chabout J, Sarkar A, Patel SR, Radden T, Dunson DB, Fisher SE, Jarvis ED. 2016. A  
835 *foxp2* mutation implicated in human speech deficits alters sequencing of ultrasonic  
836 vocalizations in adult male mice. *Frontiers in behavioral neuroscience*. 10:197.
- 837 Chen J, Bardes EE, Aronow BJ, Jegga AG. 2009. Toppgene suite for gene list enrichment  
838 analysis and candidate gene prioritization. *Nucleic acids research*. 37(Web Server  
839 issue):W305-311.
- 840 Chen YC, Kuo HY, Bornschein U, Takahashi H, Chen SY, Lu KM, Yang HY, Chen GM,  
841 Lin JR, Lee YH et al. 2016. *Foxp2* controls synaptic wiring of corticostriatal circuits  
842 and vocal communication by opposing *mef2c*. *Nature neuroscience*. 19(11):1513-  
843 1522.
- 844 Crandall JE, McCarthy DM, Araki KY, Sims JR, Ren JQ, Bhide PG. 2007. Dopamine  
845 receptor activation modulates gaba neuron migration from the basal forebrain to  
846 the cerebral cortex. *The Journal of neuroscience* : the official journal of the Society  
847 for Neuroscience. 27(14):3813-3822.
- 848 Cui Q, Li Q, Geng H, Chen L, Ip NY, Ke Y, Yung WH. 2018. Dopamine receptors mediate  
849 strategy abandoning via modulation of a specific prefrontal cortex-nucleus  
850 accumbens pathway in mice. *Proceedings of the National Academy of Sciences*  
851 *of the United States of America*. 115(21):E4890-e4899.
- 852 Cullity ER, Madsen HB, Perry CJ, Kim JH. 2018. Postnatal developmental trajectory of  
853 dopamine receptor 1 and 2 expression in cortical and striatal brain regions. *The*  
854 *Journal of comparative neurology*.
- 855 Cuomo V, Cagiano R, Renna G, De Salvia MA, Racagni G. 1987. Ultrasonic vocalization  
856 in rat pups: Effects of early postnatal exposure to sch 23390 (a *da1*-receptor  
857 antagonist) and sulpiride (a *da2*-receptor antagonist). *Neuropharmacology*.  
858 26(7a):701-705.
- 859 Demontis D, Walters RK, Martin J, Mattheisen M, Als TD, Agerbo E, Baldursson G,  
860 Belliveau R, Bybjerg-Grauholm J, Baekvad-Hansen M et al. 2019. Discovery of the  
861 first genome-wide significant risk loci for attention deficit/hyperactivity disorder.  
862 *Nature genetics*. 51(1):63-75.
- 863 Deriziotis P, O'Roak BJ, Graham SA, Estruch SB, Dimitropoulou D, Bernier RA, Gerds  
864 J, Shendure J, Eichler EE, Fisher SE. 2014. De novo *tbr1* mutations in sporadic  
865 autism disrupt protein functions. *Nature communications*. 5:4954.
- 866 Dobin A, Davis CA, Schlesinger F, Drenkow J, Zaleski C, Jha S, Batut P, Chaisson M,  
867 Gingeras TR. 2013. Star: Ultrafast universal rna-seq aligner. *Bioinformatics*  
868 (Oxford, England). 29(1):15-21.



- 869 Enard W, Gehre S, Hammerschmidt K, Holter SM, Blass T, Somel M, Bruckner MK,  
870 Schreiweis C, Winter C, Sohr R et al. 2009. A humanized version of *foxp2* affects  
871 cortico-basal ganglia circuits in mice. *Cell*. 137(5):961-971.
- 872 Fazel Darbandi S, Robinson Schwartz SE, Qi Q, Catta-Preta R, Pai EL, Mandell JD,  
873 Everitt A, Rubin A, Krasnoff RA, Katzman S et al. 2018. Neonatal *tbr1* dosage  
874 controls cortical layer 6 connectivity. *Neuron*. 100(4):831-845.e837.
- 875 Feng X, Henriquez VM, Walters JR, Ludlow CL. 2009. Effects of dopamine d1 and d2  
876 receptor antagonists on laryngeal neurophysiology in the rat. *Journal of*  
877 *neurophysiology*. 102(2):1193-1205.
- 878 Ferland RJ, Cherry TJ, Preware PO, Morrisey EE, Walsh CA. 2003. Characterization of  
879 *foxp2* and *foxp1* mRNA and protein in the developing and mature brain. *The Journal*  
880 *of comparative neurology*. 460(2):266-279.
- 881 Floresco SB. 2013. Prefrontal dopamine and behavioral flexibility: Shifting from an  
882 "inverted-u" toward a family of functions. *Front Neurosci*. 7:62.
- 883 French CA, Fisher SE. 2014. What can mice tell us about *foxp2* function? *Current opinion*  
884 *in neurobiology*. 28:72-79.
- 885 French CA, Groszer M, Preece C, Coupe AM, Rajewsky K, Fisher SE. 2007. Generation  
886 of mice with a conditional *foxp2* null allele. *Genesis (New York, NY : 2000)*.  
887 45(7):440-446.
- 888 French CA, Vinueza Veloz MF, Zhou K, Peter S, Fisher SE, Costa RM, De Zeeuw CI.  
889 2018. Differential effects of *foxp2* disruption in distinct motor circuits. *Molecular*  
890 *psychiatry*. 24(3):447-462.
- 891 Fujita-Jimbo E, Momoi T. 2014. Specific expression of *foxp2* in cerebellum improves  
892 ultrasonic vocalization in heterozygous but not in homozygous *foxp2* (r552h)  
893 knock-in pups. *Neuroscience letters*. 566:162-166.
- 894 Garcia-Calero E, Botella-Lopez A, Bahamonde O, Perez-Balaguer A, Martinez S. 2016.  
895 *Foxp2* protein levels regulate cell morphology changes and migration patterns in  
896 the vertebrate developing telencephalon. *Brain Struct Funct*. 221(6):2905-2917.
- 897 Gaspar P, Bloch B, Le Moine C. 1995. D1 and d2 receptor gene expression in the rat  
898 frontal cortex: Cellular localization in different classes of efferent neurons. *The*  
899 *European journal of neuroscience*. 7(5):1050-1063.
- 900 Gaub S, Fisher SE, Ehret G. 2016. Ultrasonic vocalizations of adult male *foxp2*-mutant  
901 mice: Behavioral contexts of arousal and emotion. *Genes, brain, and behavior*.  
902 15(2):243-259.
- 903 Gaub S, Groszer M, Fisher SE, Ehret G. 2010. The structure of innate vocalizations in  
904 *foxp2*-deficient mouse pups. *Genes, brain, and behavior*. 9(4):390-401.
- 905 Goebbels S, Bormuth I, Bode U, Hermanson O, Schwab MH, Nave KA. 2006. Genetic  
906 targeting of principal neurons in neocortex and hippocampus of *nex-cre* mice.  
907 *Genesis (New York, NY : 2000)*. 44(12):611-621.
- 908 Gorski JA, Talley T, Qiu M, Puelles L, Rubenstein JL, Jones KR. 2002. Cortical excitatory  
909 neurons and glia, but not gabaergic neurons, are produced in the *emx1*-expressing  
910 lineage. *The Journal of neuroscience : the official journal of the Society for*  
911 *Neuroscience*. 22(15):6309-6314.
- 912 Groszer M, Keays DA, Deacon RM, de Bono JP, Prasad-Mulcare S, Gaub S, Baum MG,  
913 French CA, Nicod J, Coventry JA et al. 2008. Impaired synaptic plasticity and

- 914 motor learning in mice with a point mutation implicated in human speech deficits.  
915 *Current biology* : CB. 18(5):354-362.
- 916 Han SW, Kim YC, Narayanan NS. 2017. Projection targets of medial frontal d1dr-  
917 expressing neurons. *Neuroscience letters*. 655:166-171.
- 918 Hickey SL, Berto S, Konopka G. 2019. Chromatin decondensation by foxp2 promotes  
919 human neuron maturation and expression of neurodevelopmental disease genes.  
920 *Cell reports*. In press.
- 921 Hisaoka T, Nakamura Y, Senba E, Morikawa Y. 2010. The forkhead transcription factors,  
922 foxp1 and foxp2, identify different subpopulations of projection neurons in the  
923 mouse cerebral cortex. *Neuroscience*. 166(2):551-563.
- 924 Holy TE, Guo Z. 2005. Ultrasonic songs of male mice. *PLoS biology*. 3(12):e386.
- 925 Huang TN, Chuang HC, Chou WH, Chen CY, Wang HF, Chou SJ, Hsueh YP. 2014. Tbr1  
926 haploinsufficiency impairs amygdalar axonal projections and results in cognitive  
927 abnormality. *Nature neuroscience*. 17(2):240-247.
- 928 Jacobs EC, Campagnoni C, Kampf K, Reyes SD, Kalra V, Handley V, Xie YY, Hong-Hu  
929 Y, Spreur V, Fisher RS et al. 2007. Visualization of corticofugal projections during  
930 early cortical development in a tau-gfp-transgenic mouse. *The European journal*  
931 *of neuroscience*. 25(1):17-30.
- 932 Kast RJ, Lanjewar AL, Smith CD, Levitt P. 2019. Foxp2 exhibits neuron class specific  
933 expression, but is not required for multiple aspects of cortical histogenesis. *eLife*.  
934 8.
- 935 Kent WJ, Sugnet CW, Furey TS, Roskin KM, Pringle TH, Zahler AM, Haussler D. 2002.  
936 The human genome browser at ucsc. *Genome research*. 12(6):996-1006.
- 937 Konopka G, Roberts TF. 2016. Insights into the neural and genetic basis of vocal  
938 communication. *Cell*. 164(6):1269-1276.
- 939 Lalonde R. 2002. The neurobiological basis of spontaneous alternation. *Neuroscience*  
940 *and biobehavioral reviews*. 26(1):91-104.
- 941 Liao Y, Smyth GK, Shi W. 2014. Featurecounts: An efficient general purpose program for  
942 assigning sequence reads to genomic features. *Bioinformatics (Oxford, England)*.  
943 30(7):923-930.
- 944 Lim L, Mi D, Llorca A, Marin O. 2018. Development and functional diversification of  
945 cortical interneurons. *Neuron*. 100(2):294-313.
- 946 Liu J, Wang F, Huang C, Long LH, Wu WN, Cai F, Wang JH, Ma LQ, Chen JG. 2009.  
947 Activation of phosphatidylinositol-linked novel d1 dopamine receptor contributes to  
948 the calcium mobilization in cultured rat prefrontal cortical astrocytes. *Cellular and*  
949 *molecular neurobiology*. 29(3):317-328.
- 950 Loo L, Simon JM, Xing L, McCoy ES, Niehaus JK, Guo J, Anton ES, Zylka MJ. 2019.  
951 Single-cell transcriptomic analysis of mouse neocortical development. *Nature*  
952 *communications*. 10(1):134.
- 953 Mala H, Andersen LG, Christensen RF, Felbinger A, Hagstrom J, Meder D, Pearce H,  
954 Mogensen J. 2015. Prefrontal cortex and hippocampus in behavioural flexibility  
955 and posttraumatic functional recovery: Reversal learning and set-shifting in rats.  
956 *Brain research bulletin*. 116:34-44.
- 957 Medvedeva VP, Rieger MA, Vieth B, Mombereau C, Ziegenhain C, Ghosh T, Cressant A,  
958 Enard W, Granon S, Dougherty JD et al. 2018. Altered social behavior in mice  
959 carrying a cortical foxp2 deletion. *Human molecular genetics*.

- 960 Meechan DW, Rutz HLH, Fralish MS, Maynard TM, Rothblat LA, LaMantia A-S. 2013.  
961 Cognitive ability is associated with altered medial frontal cortical circuits in the Igdel  
962 mouse model of 22q11.2ds. *Cerebral Cortex*. 25(5):1143-1151.
- 963 Mizoguchi K, Shoji H, Tanaka Y, Tabira T. 2010. Orbitofrontal dopaminergic dysfunction  
964 causes age-related impairment of reversal learning in rats. *Neuroscience*.  
965 170(4):1110-1119.
- 966 Molyneaux BJ, Goff LA, Brettler AC, Chen HH, Hrvatin S, Rinn JL, Arlotta P. 2015. Decon:  
967 Genome-wide analysis of in vivo transcriptional dynamics during pyramidal neuron  
968 fate selection in neocortex. *Neuron*. 85(2):275-288.
- 969 Money KM, Stanwood GD. 2013. Developmental origins of brain disorders: Roles for  
970 dopamine. *Frontiers in cellular neuroscience*. 7:260.
- 971 Morgan A, Fisher SE, Scheffer I, Hildebrand M. 2017. Foxp2-related speech and  
972 language disorders. In: Adam MP, Ardinger HH, Pagon RA, Wallace SE, Bean  
973 LJH, Stephens K, Amemiya A, editors. *GeneReviews*((r)). Seattle (WA): University  
974 of Washington, Seattle
- 975 University of Washington, Seattle. GeneReviews is a registered trademark of the  
976 University of Washington, Seattle. All rights reserved.
- 977 Murugan M, Harward S, Scharff C, Mooney R. 2013. Diminished foxp2 levels affect  
978 dopaminergic modulation of corticostriatal signaling important to song variability.  
979 *Neuron*. 80(6):1464-1476.
- 980 Nakayama H, Ibanez-Tallon I, Heintz N. 2018. Cell-type-specific contributions of medial  
981 prefrontal neurons to flexible behaviors. *The Journal of neuroscience : the official  
982 journal of the Society for Neuroscience*. 38(19):4490-4504.
- 983 Ott T, Nieder A. 2019. Dopamine and cognitive control in prefrontal cortex. *Trends in  
984 Cognitive Sciences*. 23(3):213-234.
- 985 Portmann T, Yang M, Mao R, Panagiotakos G, Ellegood J, Dolen G, Bader PL, Grueter  
986 BA, Gould C, Fisher E et al. 2014. Behavioral abnormalities and circuit defects in  
987 the basal ganglia of a mouse model of 16p11.2 deletion syndrome. *Cell reports*.  
988 7(4):1077-1092.
- 989 Reuter MS, Riess A, Moog U, Briggs TA, Chandler KE, Rauch A, Stampfer M, Steindl K,  
990 Glaser D, Joset P et al. 2017. Foxp2 variants in 14 individuals with developmental  
991 speech and language disorders broaden the mutational and clinical spectrum.  
992 *Journal of medical genetics*. 54(1):64-72.
- 993 Rieger MA, Dougherty JD. 2016. Analysis of within subjects variability in mouse ultrasonic  
994 vocalization: Pups exhibit inconsistent, state-like patterns of call production.  
995 *Frontiers in behavioral neuroscience*. 10:182.
- 996 Satterstrom FK, Kosmicki JA, Wang J, Breen MS, De Rubeis S, An J-Y, Peng M, Collins  
997 RL, Grove J, Klei L et al. 2019. Large-scale exome sequencing study implicates  
998 both developmental and functional changes in the neurobiology of autism.  
999 bioRxiv.484113.
- 1000 Schreiweis C, Bornschein U, Burguiere E, Kerimoglu C, Schreiter S, Dannemann M,  
1001 Goyal S, Rea E, French CA, Puliyadi R et al. 2014. Humanized foxp2 accelerates  
1002 learning by enhancing transitions from declarative to procedural performance.  
1003 *Proceedings of the National Academy of Sciences of the United States of America*.  
1004 111(39):14253-14258.

- 1005 Schulze K, Vargha-Khadem F, Mishkin M. 2017. Phonological working memory and  
1006 foxp2. *Neuropsychologia*. 108:147-152.
- 1007 Sia GM, Clem RL, Hugarir RL. 2013. The human language-associated gene *srxp2*  
1008 regulates synapse formation and vocalization in mice. *Science (New York, NY)*.  
1009 342(6161):987-991.
- 1010 Smith T, Heger A, Sudbery I. 2017. Umi-tools: Modeling sequencing errors in unique  
1011 molecular identifiers to improve quantification accuracy. *Genome research*.  
1012 27(3):491-499.
- 1013 Sohur US, Padmanabhan HK, Kotchetkov IS, Menezes JRL, Macklis JD. 2014. Anatomic  
1014 and molecular development of corticostriatal projection neurons in mice. *Cerebral*  
1015 *cortex (New York, NY : 1991)*. 24(2):293-303.
- 1016 Sorensen SA, Bernard A, Menon V, Royall JJ, Glattfelder KJ, Desta T, Hirokawa K,  
1017 Mortrud M, Miller JA, Zeng H et al. 2015. Correlated gene expression and target  
1018 specificity demonstrate excitatory projection neuron diversity. *Cerebral cortex*  
1019 *(New York, NY : 1991)*. 25(2):433-449.
- 1020 Stoodley CJ, D'Mello AM, Ellegood J, Jakkamsetti V, Liu P, Nebel MB, Gibson JM, Kelly  
1021 E, Meng F, Cano CA et al. 2017. Altered cerebellar connectivity in autism and  
1022 cerebellar-mediated rescue of autism-related behaviors in mice. *Nature*  
1023 *neuroscience*. 20(12):1744-1751.
- 1024 Supek F, Bosnjak M, Skunca N, Smuc T. 2011. Revigo summarizes and visualizes long  
1025 lists of gene ontology terms. *PloS one*. 6(7):e21800.
- 1026 Tarazi FI, Tomasini EC, Baldessarini RJ. 1999. Postnatal development of dopamine d1-  
1027 like receptors in rat cortical and striatolimbic brain regions: An autoradiographic  
1028 study. *Developmental neuroscience*. 21(1):43-49.
- 1029 Tasic B, Menon V, Nguyen TN, Kim TK, Jarsky T, Yao Z, Levi B, Gray LT, Sorensen SA,  
1030 Dolbeare T et al. 2016. Adult mouse cortical cell taxonomy revealed by single cell  
1031 transcriptomics. *Nature neuroscience*. 19(2):335-346.
- 1032 Tasic B, Yao Z, Graybuck LT, Smith KA, Nguyen TN, Bertagnolli D, Goldy J, Garren E,  
1033 Economo MN, Viswanathan S et al. 2018. Shared and distinct transcriptomic cell  
1034 types across neocortical areas. *Nature*. 563(7729):72-78.
- 1035 Thompson JL, Yang J, Lau B, Liu S, Baimel C, Kerr LE, Liu F, Borgland SL. 2016. Age-  
1036 dependent d1-d2 receptor coactivation in the lateral orbitofrontal cortex potentiates  
1037 nmda receptors and facilitates cognitive flexibility. *Cerebral cortex (New York, NY*  
1038 *: 1991)*. 26(12):4524-4539.
- 1039 Tsui D, Vessey JP, Tomita H, Kaplan DR, Miller FD. 2013. Foxp2 regulates neurogenesis  
1040 during embryonic cortical development. *The Journal of neuroscience : the official*  
1041 *journal of the Society for Neuroscience*. 33(1):244-258.
- 1042 Usui N, Araujo DJ, Kulkarni A, Co M, Ellegood J, Harper M, Toriumi K, Lerch JP, Konopka  
1043 G. 2017a. Foxp1 regulation of neonatal vocalizations via cortical development.  
1044 *Genes & development*. 31(20):2039-2055.
- 1045 Usui N, Co M, Harper M, Rieger MA, Dougherty JD, Konopka G. 2017b. Sumoylation of  
1046 foxp2 regulates motor function and vocal communication through purkinje cell  
1047 development. *Biological psychiatry*. 81(3):220-230.
- 1048 van Rooij D, Anagnostou E, Arango C, Auzias G, Behrmann M, Busatto GF, Calderoni S,  
1049 Daly E, Deruelle C, Di Martino A et al. 2018. Cortical and subcortical brain  
1050 morphometry differences between patients with autism spectrum disorder and



1051 healthy individuals across the lifespan: Results from the enigma asd working  
1052 group. *The American journal of psychiatry*. 175(4):359-369.

1053 Van Segbroeck M, Knoll AT, Levitt P, Narayanan S. 2017. Mupet-mouse ultrasonic profile  
1054 extraction: A signal processing tool for rapid and unsupervised analysis of  
1055 ultrasonic vocalizations. *Neuron*. 94(3):465-485.e465.

1056 Vargha-Khadem F, Gadian DG, Copp A, Mishkin M. 2005. Foxp2 and the neuroanatomy  
1057 of speech and language. *Nature reviews Neuroscience*. 6(2):131-138.

1058 Vernes SC, Oliver PL, Spiteri E, Lockstone HE, Puliyadi R, Taylor JM, Ho J, Mombereau  
1059 C, Brewer A, Lowy E et al. 2011. Foxp2 regulates gene networks implicated in  
1060 neurite outgrowth in the developing brain. *PLoS genetics*. 7(7):e1002145.

1061 Vila-Ballo A, Mas-Herrero E, Ripolles P, Simo M, Miro J, Cucurell D, Lopez-Barroso D,  
1062 Juncadella M, Marco-Pallares J, Falip M et al. 2017. Unraveling the role of the  
1063 hippocampus in reversal learning. *The Journal of neuroscience : the official journal of*  
1064 *the Society for Neuroscience*. 37(28):6686-6697.

1065 Vincent SL, Khan Y, Benes FM. 1993. Cellular distribution of dopamine d1 and d2  
1066 receptors in rat medial prefrontal cortex. *The Journal of neuroscience : the official*  
1067 *journal of the Society for Neuroscience*. 13(6):2551-2564.

1068 Wester JC, Mahadevan V, Rhodes CT, Calvigioni D, Venkatesh S, Maric D, Hunt S, Yuan  
1069 X, Zhang Y, Petros TJ et al. 2019. Neocortical projection neurons instruct inhibitory  
1070 interneuron circuit development in a lineage-dependent manner. *Neuron*.

1071 Xu S, Liu P, Chen Y, Chen Y, Zhang W, Zhao H, Cao Y, Wang F, Jiang N, Lin S et al.  
1072 2018. Foxp2 regulates anatomical features that may be relevant for vocal  
1073 behaviors and bipedal locomotion. *Proceedings of the National Academy of*  
1074 *Sciences*.

1075 Yang M, Lewis FC, Sarvi MS, Foley GM, Crawley JN. 2015. 16p11.2 deletion mice display  
1076 cognitive deficits in touchscreen learning and novelty recognition tasks. *Learning*  
1077 *& memory (Cold Spring Harbor, NY)*. 22(12):622-632.

1078 Zheng GX, Terry JM, Belgrader P, Ryvkin P, Bent ZW, Wilson R, Ziraldo SB, Wheeler  
1079 TD, McDermott GP, Zhu J et al. 2017. Massively parallel digital transcriptional  
1080 profiling of single cells. *Nature communications*. 8:14049.

1081
